# Supplementary material for: ADF and cofilin-1 collaborate to promote cortical actin flow and the leader bleb-based migration of confined cells
Source: eLife. 2021 Jun 25;10:e67856. doi: 10.7554/eLife.67856 (PMC8253594; doi:10.7554/eLife.67856)
Supplement: Figure 1—source data 1. — Spreadsheet of x-y coordinates of cells for each frame within a video. Time interval between frames for all cells is 8 min. Data for CFL1, actin depolymerizing factor (ADF), CFL1 + ADF RNAi, as well as CFL1 + ADF RNAi cells rescued by transfection with EGFP-cofilin-1 plasmid are provided. These data are displayed as plots of origin in Figure 1E. [file elife-67856-fig1-data1.xlsx]

## Sheet: Sheet1
Non-target			siCFL1			siADF			siCFL1 + siADF			CFL1 Rescue
Frame	x	y	Frame	x	y	Frame	x	y	Frame	x	y	Frame	x	y
1	46.954	56.494	1	60.782	52.421	1	28.301	45.882	1	45.667	28.515	1	56.173	58.531
2	49.419	59.282	2	60.246	52.206	2	28.301	48.99	2	45.024	31.731	2	58.102	59.174
3	49.634	59.389	3	60.354	51.67	3	27.443	50.277	3	45.346	32.803	3	57.138	57.995
4	50.062	51.885	4	57.138	54.458	4	29.051	49.741	4	46.31	35.483	4	58.96	57.674
5	56.066	32.589	5	56.28	58.317	5	30.874	48.776	5	44.917	36.662	5	57.995	59.067
6	55.315	33.982	6	57.674	57.245	6	28.73	48.883	6	47.061	34.518	6	54.886	56.816
7	68.501	35.59	7	56.387	59.818	7	29.48	49.312	7	47.061	33.982	7	54.886	57.995
8	76.648	35.483	8	54.672	58.746	8	28.944	47.49	8	45.024	35.59	8	56.066	57.995
9	78.47	33.232	9	52.528	54.886	9	28.837	47.275	9	44.702	33.125	9	55.422	59.818
10	83.509	24.763	10	53.814	58.638	10	29.587	45.882	10	45.131	34.411	10	55.101	58.102
11	88.011	17.902	11	54.886	58.746	11	29.373	45.131	11	45.238	34.518	11	55.422	58.746
12	91.549	12.221	12	54.35	57.245	12	31.302	42.558	12	44.488	33.982	12	55.101	57.674
13	83.723	18.653	13	53.171	59.389	13	28.944	43.416	13	46.739	33.339	13	53.278	58.102
14	72.36	30.016	14	52.099	58.96	14	32.16	41.701	14	45.346	35.162	14	54.136	58.102
15	60.354	43.738	15	52.85	59.067	15	32.482	40.95	15	44.059	33.018	15	53.171	58.746
16	49.419	63.891	16	52.957	58.102	16	32.803	40.95	16	38.27	29.051	16	54.458	57.566
17	54.779	94.443	17	51.885	60.032	17	33.768	41.915	17	34.947	27.336	17	54.886	56.923
1	53.171	56.816	18	54.243	61.64	18	34.411	41.808	18	31.517	24.013	18	54.994	57.674
2	56.816	64.213	19	53.922	60.032	19	34.304	41.594	19	32.589	24.334	19	53.707	58.424
3	59.925	62.39	20	55.208	59.389	20	33.232	41.594	20	32.267	21.654	20	54.136	56.602
4	64.32	62.283	21	55.637	61.318	21	33.446	41.701	21	32.374	20.797	21	55.101	57.888
5	68.286	61.104	22	51.67	57.995	22	33.768	42.451	22	31.838	21.011	22	54.672	56.387
6	70.538	61.854	23	52.099	57.995	23	33.125	41.808	23	32.482	21.44	23	53.278	56.28
7	69.144	63.57	24	51.349	57.995	24	31.731	44.166	24	32.053	21.226	24	53.814	56.494
8	67.536	62.926	25	49.312	57.459	25	31.517	43.845	25	32.482	21.869	25	54.779	58.746
9	70.323	63.034	26	48.026	56.709	26	33.018	45.667	26	35.269	21.333	26	54.672	56.709
10	68.394	63.355	27	45.131	54.565	27	30.016	45.774	27	35.376	23.048	27	53.278	56.28
11	66.786	64.963	28	46.418	56.494	28	29.051	48.669	28	34.626	21.333	28	53.064	56.28
12	69.251	65.606	29	46.096	55.958	29	25.835	48.454	29	34.411	21.011	29	53.493	56.173
13	70.859	65.07	30	46.096	53.922	30	27.336	50.384	30	32.267	21.654	30	53.278	56.173
14	72.038	65.821	31	49.526	55.958	31	27.014	50.384	31	32.374	21.762	31	51.992	56.494
15	78.363	64.963	32	49.312	55.315	32	26.907	49.205	32	31.088	21.118	32	53.171	56.602
16	75.683	63.462	33	49.955	55.53	33	25.728	48.883	33	31.195	20.368	33	52.528	56.28
17	73.968	64.856	34	49.419	55.53	34	25.728	48.562	34	32.374	19.296	34	53.171	55.958
18	68.501	63.677	35	49.205	57.03	35	25.621	48.562	35	32.374	19.618	1	52.528	82.115
19	69.68	61.533	36	50.277	54.994	36	25.621	48.776	36	31.088	18.224	2	53.707	79.864
20	65.928	60.675	37	53.278	58.317	37	25.085	50.062	37	30.123	19.939	3	54.458	82.115
21	65.606	60.354	38	52.85	57.888	38	23.584	51.027	38	30.766	19.51	4	54.136	77.613
22	66.464	58.317	1	50.92	29.051	1	41.915	53.064	1	42.88	52.528	5	55.637	79.971
23	64.427	57.03	2	51.885	28.408	2	44.166	50.598	2	42.987	53.064	6	52.957	78.578
24	64.963	56.173	3	51.563	31.41	3	70.109	42.773	3	41.594	53.493	7	53.814	77.291
25	64.856	58.746	4	50.491	31.41	4	75.04	35.805	4	42.022	53.064	8	53.6	75.576
26	64.534	57.888	5	50.277	30.981	5	79.65	29.802	5	47.382	54.994	9	54.565	76.755
27	65.714	58.531	6	53.278	32.803	6	92.728	19.51	6	46.632	52.742	10	54.565	76.97
28	63.355	55.744	7	54.779	30.981	7	107.629	15.866	7	47.168	55.101	11	54.886	75.79
29	66.25	61.64	8	55.208	29.694	1	46.739	71.824	8	45.453	54.243	12	55.208	75.04
30	64.213	57.459	9	53.064	27.658	2	48.883	73.539	9	44.702	54.029	13	57.03	74.611
31	65.285	60.354	10	48.883	21.011	3	53.064	77.827	10	44.381	56.173	14	55.958	74.826
32	65.178	59.818	11	49.741	19.725	4	58.102	78.899	11	45.024	54.458	15	52.635	75.147
33	65.821	57.245	12	49.098	19.51	5	58.531	78.792	12	45.989	56.173	16	49.955	75.576
34	63.784	56.816	13	46.203	19.939	6	63.57	77.72	13	46.203	58.317	17	45.882	72.682
35	63.998	56.387	14	45.56	20.368	7	62.605	77.506	14	48.454	57.995	18	45.453	72.467
36	63.998	52.314	15	45.453	20.368	8	62.069	77.613	15	46.418	56.387	19	39.557	71.931
37	65.392	54.136	16	46.31	21.654	9	57.995	74.182	16	46.096	57.566	20	35.912	67.75
38	67.643	53.386	17	46.739	25.299	10	56.494	74.182	17	47.811	55.422	21	28.944	63.462
1	39.128	45.56	18	50.17	22.083	11	56.816	73.646	18	48.454	56.28	22	23.691	56.494
2	41.594	46.203	19	50.706	21.654	12	55.315	76.862	19	46.418	55.851	23	18.653	52.85
3	42.773	48.133	20	51.242	24.978	13	55.851	77.72	20	45.024	56.28	24	13.293	50.277
4	48.026	48.454	21	51.134	24.763	14	58.102	78.256	21	45.56	56.28	25	10.506	46.954
5	52.528	46.632	22	50.92	24.442	15	59.067	77.398	22	45.774	55.851	26	7.397	44.166
6	51.242	44.595	23	50.92	24.978	16	60.246	78.363	23	44.166	56.28	27	8.04	45.131
7	49.634	45.131	24	50.813	24.87	17	55.208	76.755	24	46.203	56.602	28	8.683	43.952
8	50.17	47.061	25	50.813	25.299	18	57.03	76.005	25	44.274	57.995	29	8.04	40.736
9	53.814	46.096	26	50.813	25.192	19	56.173	70.752	26	44.595	56.066	30	8.898	40.843
10	53.171	48.026	27	48.99	27.122	20	55.744	74.504	27	45.024	56.923	31	10.506	43.094
11	52.528	53.064	28	46.203	27.122	21	56.709	74.611	28	45.989	55.958	32	8.147	42.13
12	51.242	54.136	29	46.203	27.122	22	56.923	72.789	29	45.989	56.066	33	9.005	43.63
13	47.597	54.779	30	43.738	26.371	23	57.138	71.395	30	46.096	55.958	34	9.434	44.166
14	44.702	53.6	31	46.096	27.014	24	60.139	72.038	31	44.595	53.6	35	8.683	42.558
15	47.168	52.206	32	43.523	26.907	25	59.067	72.682	32	43.845	53.814	36	9.862	46.31
16	46.954	53.386	33	44.166	24.656	26	59.818	72.36	33	44.917	54.565	37	6.861	46.096
17	50.813	56.816	34	43.738	24.442	27	60.89	75.576	34	44.381	55.958	39	9.862	44.595
18	48.669	53.922	35	43.309	27.122	28	60.139	75.898	35	44.488	57.03	1	55.208	77.72
19	45.024	54.779	36	43.202	26.8	29	60.354	76.219	36	46.954	55.315	2	53.278	76.648
20	40.2	57.566	37	43.094	26.907	30	60.246	75.79	37	45.453	55.422	3	54.672	75.79
21	36.77	56.173	38	45.453	27.336	31	62.39	76.219	38	45.882	54.779	4	58.102	76.648
22	22.941	54.779	1	50.384	36.448	32	64.749	78.792	1	40.522	76.648	5	60.675	76.97
23	28.086	56.709	2	46.954	40.736	33	64.749	78.899	2	41.165	75.254	6	61.962	76.541
24	23.37	59.71	3	49.634	37.949	34	64.963	78.899	3	40.093	78.47	7	63.034	76.112
25	25.942	57.566	4	50.277	39.342	35	64.534	78.47	4	40.736	78.47	8	62.605	77.934
26	22.405	55.208	5	50.491	39.557	36	64.427	78.363	5	43.845	77.827	9	63.784	77.077
27	23.477	54.886	6	50.598	39.235	37	64.213	77.827	6	41.915	78.899	10	65.178	78.042
28	21.654	54.136	7	51.027	39.235	38	64.106	78.149	7	44.381	78.792	11	65.928	76.005
29	18.01	54.565	8	50.384	39.021	1	81.258	69.358	8	43.309	80.4	12	67.643	78.685
30	19.618	49.955	9	52.314	36.448	2	80.507	67.107	9	43.845	81.15	13	65.499	78.47
31	19.51	57.03	10	52.421	37.52	3	80.614	71.181	10	42.237	83.938	14	68.93	78.256
32	18.867	54.243	11	54.565	36.448	4	82.222	70.216	11	41.915	84.259	15	70.645	77.613
33	15.758	51.67	12	54.458	35.483	5	83.402	71.074	12	42.344	84.902	16	72.253	77.827
34	17.366	51.885	13	54.779	36.126	6	84.474	70.752	13	42.666	86.939	17	71.824	78.685
35	11.363	50.92	14	54.886	36.019	7	85.224	70.002	14	42.666	86.403	18	73.968	77.72
36	18.01	53.707	15	55.315	33.446	8	86.939	70.645	15	42.666	87.046	19	77.827	79.006
37	16.08	47.061	16	56.923	30.123	9	88.011	72.038	16	39.771	90.477	20	80.936	79.114
38	15.008	44.81	17	56.816	30.123	10	88.762	72.146	17	40.2	90.155	21	83.83	77.72
1	42.558	55.101	18	57.566	31.731	11	88.44	72.789	18	39.771	89.19	22	84.152	79.542
2	45.774	60.246	19	57.674	30.981	12	88.118	71.61	19	40.307	89.405	23	84.688	78.042
3	52.099	61.426	20	58.21	30.874	13	90.048	72.682	20	38.485	85.653	24	89.083	79.435
4	58.96	60.997	21	60.246	27.014	14	90.262	73.11	21	38.592	85.546	25	90.798	79.757
5	62.283	62.283	22	61.64	26.586	15	91.87	74.504	22	40.629	84.581	26	89.726	77.827
6	63.141	61.962	23	63.034	25.299	16	90.906	72.682	23	39.986	85.331	27	94.122	79.542
7	61.533	66.25	24	63.891	24.87	17	92.192	72.574	24	41.594	82.866	28	93.907	78.256
8	65.285	66.142	25	61.64	26.8	18	91.549	73.646	25	42.451	83.08	29	95.301	77.827
9	67.75	65.285	26	61.962	26.264	19	92.621	75.254	26	42.558	81.579	30	98.946	79.114
10	63.141	65.821	27	60.461	26.371	20	92.085	75.898	27	45.024	84.474	31	101.411	79.65
11	63.248	66.25	28	60.246	27.014	21	89.298	71.502	28	44.274	84.045	32	100.982	79.221
12	62.069	68.179	29	60.139	26.586	22	87.582	73.539	29	43.523	84.902	33	103.019	76.97
13	59.603	64.642	30	61.211	26.693	23	88.869	71.824	30	45.774	85.76	34	102.483	77.077
14	64.749	58.746	31	62.498	25.299	24	87.368	72.682	31	48.133	87.261	35	106.021	78.042
15	63.141	65.714	32	67.214	23.906	25	91.013	75.04	32	47.49	86.939	36	106.771	77.077
16	63.034	61.962	33	67.643	24.013	26	91.013	75.04	33	47.597	87.261	37	106.771	76.862
17	62.712	65.606	34	69.68	22.405	27	91.227	73.539	34	47.811	87.368	38	106.771	77.291
18	60.782	71.181	35	67.75	23.37	28	93.693	74.933	35	47.704	86.939	1	45.024	63.034
19	57.566	74.397	36	68.072	22.619	29	89.083	76.219	36	47.918	86.618	2	44.488	65.714
20	57.674	77.184	37	68.072	22.834	30	89.083	77.827	37	46.954	89.19	3	45.667	64.213
21	60.354	78.792	38	68.286	23.048	31	84.902	77.506	40	49.312	90.262	4	48.026	65.07
22	62.283	83.938	1	65.928	43.416	32	84.366	78.47	1	71.61	82.758	5	48.026	64.642
23	61.104	83.187	2	67.858	38.378	33	82.008	77.506	2	74.182	82.651	6	48.026	65.928
24	67.75	77.077	3	68.822	41.701	34	85.653	73.325	3	74.397	81.579	7	50.277	65.392
25	66.357	74.826	4	69.251	45.024	35	87.154	72.146	4	72.467	83.294	8	48.454	65.178
26	65.821	74.182	5	68.715	43.845	36	87.582	72.253	5	74.611	83.402	9	51.349	64.534
27	63.677	72.574	6	68.93	42.987	37	87.582	73.754	6	72.896	83.723	10	52.206	63.784
28	63.57	71.717	7	69.037	43.202	38	87.154	75.683	7	74.397	84.902	11	55.53	63.141
29	62.819	76.005	8	66.035	40.843	1	60.997	49.634	8	75.254	85.331	12	56.602	62.819
30	59.603	73.968	9	66.893	42.451	2	60.89	50.598	9	76.434	87.904	13	56.387	60.568
31	59.603	69.358	10	65.499	37.198	3	60.246	47.918	10	76.326	85.76	14	56.816	61.747
32	61.962	67.322	11	64.427	37.842	4	56.494	48.99	11	77.934	86.082	15	56.173	60.246
33	60.139	68.286	12	64.213	38.592	5	57.781	49.205	1	77.398	86.51	16	56.173	62.283
34	60.89	70.323	13	64.963	41.165	6	56.173	44.595	2	77.184	86.403	17	53.064	66.142
35	59.818	67.75	14	65.178	36.126	7	56.066	45.774	3	76.434	87.154	18	51.349	65.606
36	61.104	68.179	15	64.213	38.163	8	56.173	44.059	4	76.112	87.475	19	50.813	67.75
37	60.032	68.394	16	66.357	34.84	9	54.565	44.381	5	75.898	87.904	20	51.242	66.357
38	60.139	69.466	17	67.107	38.806	10	54.886	42.987	6	77.184	86.832	21	51.456	66.464
1	57.459	55.851	18	69.358	36.77	11	53.171	43.738	7	76.326	87.582	22	49.955	70.002
2	55.315	53.278	19	67.858	36.234	12	54.136	40.736	8	76.541	88.118	23	50.062	70.109
3	56.816	54.672	20	67.965	36.877	13	54.458	40.736	9	75.254	89.619	24	48.133	72.682
4	60.246	53.386	21	69.787	37.091	14	54.35	40.522	10	75.254	89.512	25	47.811	72.789
5	61.747	54.029	22	66.678	35.483	15	52.85	41.058	11	75.469	90.155	26	48.24	73.539
6	69.68	50.598	23	66.786	36.341	16	51.885	39.342	12	76.434	89.619	27	48.026	74.504
7	76.005	51.992	24	64.856	35.805	17	52.957	39.128	13	76.326	88.547	28	48.454	73.432
8	74.826	53.386	25	65.821	37.091	18	53.6	38.163	14	76.755	88.011	29	48.454	72.789
9	77.506	54.886	26	66.464	36.341	19	51.992	38.485	15	77.184	87.904	30	49.526	75.04
10	86.939	47.168	27	66.464	36.341	20	53.171	40.522	16	76.648	89.405	31	50.277	74.504
11	90.798	48.24	28	66.571	31.517	21	52.85	39.235	17	76.541	89.619	32	50.277	74.611
12	89.405	47.704	29	67.107	29.266	22	52.528	33.875	18	77.184	88.011	33	50.17	74.397
13	90.048	46.31	30	67.75	27.979	23	51.67	34.304	19	77.506	88.654	34	51.992	71.931
14	94.658	43.416	31	68.286	28.086	24	49.741	32.696	20	76.648	90.048	35	51.67	73.754
15	95.194	47.597	32	69.466	30.874	25	49.741	33.018	21	77.827	89.941	36	53.707	72.574
16	95.086	44.381	33	68.501	30.23	26	50.491	33.018	22	78.149	89.083	37	54.779	72.038
17	91.013	40.843	34	66.571	31.517	27	49.741	33.554	23	76.648	86.725	39	55.637	74.933
18	92.192	34.733	35	66.571	31.41	28	48.776	32.053	24	76.97	88.118	1	90.37	51.242
19	92.514	31.41	36	66.571	31.41	29	48.776	31.731	25	77.184	88.762	2	82.973	52.528
20	90.584	37.198	37	66.571	31.517	30	50.17	34.304	26	77.827	88.011	3	77.184	55.637
21	93.478	31.838	38	66.571	31.41	31	50.598	33.875	28	77.934	86.51	4	74.182	53.493
22	94.443	32.589	1	53.493	59.389	32	48.562	33.339	1	63.57	44.488	5	72.36	57.03
23	94.55	29.158	2	54.029	59.389	33	49.098	33.982	2	70.538	45.453	6	73.539	54.029
24	92.621	30.016	3	55.53	57.245	34	49.634	34.304	3	76.326	45.024	7	73.325	53.814
25	93.693	32.16	4	53.707	60.246	35	49.526	34.304	4	81.472	40.736	8	73.218	53.922
26	98.088	35.698	5	55.208	59.282	36	51.242	32.803	5	86.51	39.664	9	73.11	53.814
27	97.338	35.805	6	56.709	59.925	37	51.885	31.731	6	87.475	37.306	10	72.038	52.314
28	101.626	38.592	7	55.53	59.389	38	51.242	32.482	7	80.4	39.45	11	73.325	53.922
29	106.45	39.45	8	55.637	58.96	1	23.155	63.891	8	78.149	41.272	12	73.325	53.922
30	105.056	39.557	9	56.173	57.995	2	23.262	61.318	9	78.685	41.379	13	70.538	53.171
31	105.27	42.237	10	57.888	56.387	3	22.298	63.784	10	79.435	41.058	14	69.573	53.814
32	105.914	39.235	11	58.102	57.566	4	22.834	62.926	11	78.792	40.093	15	67.965	55.208
33	104.734	39.771	12	57.674	57.781	5	21.118	61.747	12	78.685	40.736	16	68.715	56.709
34	105.056	40.629	13	57.03	56.494	6	21.011	60.246	13	80.078	39.128	17	68.179	55.101
35	104.52	40.2	14	56.602	57.138	7	22.834	59.925	14	81.365	37.198	18	70.966	57.138
36	104.198	43.952	15	58.96	56.28	8	23.906	57.995	15	78.256	40.95	19	72.896	55.53
37	105.914	48.026	16	55.315	56.494	9	24.763	58.638	16	79.864	41.165	20	72.789	55.744
38	106.021	49.312	17	55.53	57.566	10	22.619	59.818	17	79.006	38.914	21	73.218	53.922
1	38.592	68.394	18	58.638	58.531	11	25.621	58.531	18	80.078	41.379	22	71.181	54.994
2	40.307	69.68	19	56.387	59.925	12	24.013	60.139	19	81.15	42.451	23	72.896	54.029
3	39.664	71.717	20	56.387	59.818	13	25.406	61.64	20	85.974	41.058	24	72.896	54.029
4	39.664	69.787	21	58.853	60.139	14	26.157	62.283	21	84.581	40.093	25	71.288	52.528
5	44.595	67.214	22	57.245	59.174	15	26.586	62.176	22	86.403	36.877	26	67.965	53.493
6	45.238	70.966	23	57.138	59.282	16	27.872	62.605	23	89.726	33.554	27	69.466	51.027
7	42.666	69.251	24	57.245	58.531	17	26.907	62.605	24	88.226	36.555	28	71.931	50.491
8	43.738	67.643	25	54.779	59.174	18	29.587	61.318	25	88.654	37.627	29	72.038	48.562
9	43.094	65.714	26	54.886	60.354	19	37.306	59.282	26	88.869	37.734	30	70.002	45.774
10	43.523	67.429	27	52.421	59.818	20	41.915	55.637	27	88.547	38.056	31	70.43	45.453
11	42.344	67.75	28	53.386	59.818	21	40.093	57.459	28	86.618	39.128	32	68.608	43.738
12	44.917	68.93	29	54.565	59.174	22	41.915	57.352	29	84.688	37.949	33	69.466	45.882
13	42.558	70.323	30	54.672	58.424	23	42.558	56.173	30	85.653	37.734	34	69.573	42.666
14	45.774	67.214	31	54.672	58.96	24	40.95	54.779	31	85.867	37.734	35	69.68	42.987
15	45.131	65.928	32	51.67	58.21	25	40.95	54.779	32	85.867	36.448	36	69.68	42.666
16	51.349	61.211	33	48.347	62.605	26	40.307	56.28	33	87.261	37.091	37	70.538	44.81
17	50.706	61.962	34	50.491	62.39	27	41.165	51.992	34	88.869	37.52	38	70.645	43.416
18	49.955	59.174	35	51.885	60.89	28	38.699	50.17	35	89.083	37.627	1	62.498	48.24
19	54.458	65.07	36	50.17	60.782	29	37.413	50.491	36	88.762	37.627	2	61.854	47.918
20	51.134	61.104	37	52.528	61.211	30	38.485	47.918	37	89.298	37.091	3	63.355	45.882
21	51.885	61.64	38	54.35	66.786	31	38.27	45.56	38	87.582	38.485	4	66.25	46.846
22	47.382	65.285	1	33.232	51.134	32	39.878	46.846	1	49.526	52.421	5	66.786	52.099
23	46.31	66.678	2	33.661	51.134	33	37.413	47.168	2	48.347	52.099	6	67.429	52.099
24	48.454	67.536	3	35.805	50.813	34	36.448	41.915	3	49.955	52.528	7	67.536	53.707
25	49.741	67.965	4	36.77	50.813	35	33.982	40.736	4	49.955	52.742	8	69.251	56.494
26	52.85	65.821	5	38.592	50.062	36	33.018	39.45	5	51.563	53.6	9	67.214	56.494
27	52.957	64.749	6	34.626	52.957	37	33.768	38.163	6	51.349	55.208	10	65.285	55.851
28	51.563	62.176	7	35.162	59.603	38	31.302	34.733	7	51.134	54.994	11	64.427	52.206
29	53.386	63.784	8	38.056	59.496	1	42.451	30.552	8	51.885	54.458	12	65.392	51.885
30	53.386	65.928	9	36.984	59.389	2	42.451	27.229	9	51.885	52.957	13	63.784	48.669
31	52.421	66.357	10	39.771	57.352	3	40.629	26.264	10	49.955	55.315	14	61.104	46.203
32	52.635	62.39	11	37.198	53.493	4	41.594	24.013	11	53.386	51.885	15	61.533	44.274
33	51.67	62.069	12	36.877	53.707	5	35.912	24.978	12	53.386	51.885	16	62.176	45.453
34	55.637	62.605	13	32.589	52.421	6	36.555	25.728	13	53.493	51.885	17	62.712	45.453
35	54.136	60.782	14	31.195	50.598	7	36.234	20.475	14	53.493	51.778	18	62.819	45.56
36	53.707	62.069	15	26.478	43.523	8	37.627	20.261	15	53.493	51.992	19	64.32	46.096
37	55.315	61.64	16	19.51	38.806	9	37.413	22.512	16	53.493	51.992	20	64.856	45.667
38	54.458	61.962	17	13.293	36.019	10	38.914	22.083	17	53.6	52.099	21	65.714	47.061
1	48.347	73.218	18	9.005	33.768	11	38.914	24.227	18	52.528	53.493	22	66.678	47.918
2	45.989	69.144	19	4.074	30.445	12	37.091	22.405	19	52.206	53.814	23	65.928	50.277
3	48.562	65.499	20	3.323	28.837	13	37.627	22.405	20	52.528	54.886	24	63.891	50.706
4	53.493	63.677	21	3.002	30.552	14	38.806	23.048	21	55.208	52.635	25	64.427	47.49
5	57.995	64.856	22	1.501	29.158	15	40.95	21.226	22	54.672	54.35	26	66.357	48.347
6	67.858	74.182	1	82.973	61.533	16	39.771	20.904	23	57.888	51.885	27	64.106	46.846
7	82.33	78.149	2	83.509	60.89	17	41.058	18.224	24	58.317	52.742	28	67	46.525
8	95.194	79.542	3	83.723	61.533	18	41.486	15.758	25	57.888	52.635	29	66.893	47.49
9	105.914	79.971	4	83.938	61.533	19	42.987	14.365	26	57.995	53.064	30	65.285	47.811
1	59.389	56.816	5	83.723	61.854	20	50.062	10.291	27	55.637	53.814	31	66.035	46.203
2	62.39	54.136	6	83.616	60.568	21	55.208	13.722	28	55.851	53.386	32	67	46.739
3	65.499	54.886	7	85.867	60.139	22	78.899	19.832	29	56.173	53.6	1	61.318	61.747
4	64.32	53.064	8	84.902	59.282	23	95.837	33.768	30	55.851	54.243	2	61.211	59.603
5	61.962	55.101	9	85.117	59.174	1	43.309	51.885	31	57.03	52.742	3	60.568	62.39
6	63.57	51.027	10	85.76	59.389	2	41.808	50.277	32	57.459	53.6	4	60.782	62.605
7	60.675	52.742	11	86.296	58.96	3	42.344	50.491	33	60.139	51.885	5	57.566	60.246
8	66.786	51.456	12	85.224	59.174	4	44.595	51.456	34	60.032	51.778	6	59.282	61.318
9	72.146	50.17	13	85.546	59.389	5	44.166	49.741	35	64.32	51.134	7	59.282	62.39
10	76.434	48.133	14	86.51	58.531	6	47.597	49.098	36	64.106	50.277	8	58.21	61.533
11	79.328	48.133	15	86.939	59.174	7	54.994	45.346	37	60.675	50.92	9	56.173	62.926
12	77.398	52.957	16	86.939	59.496	8	60.675	44.595	39	60.139	51.885	10	55.744	62.39
13	76.112	58.531	17	86.939	60.139	9	60.675	45.238	1	34.84	54.136	11	56.28	63.677
14	77.077	57.888	18	87.475	60.89	10	62.39	45.131	2	33.446	55.101	12	56.28	64.106
15	78.685	60.89	19	87.154	60.354	11	61.854	44.595	3	34.197	54.886	13	55.637	62.283
16	83.723	62.069	20	87.475	60.997	12	61.854	45.56	4	31.302	55.101	14	55.53	62.176
17	81.579	58.21	21	88.333	60.139	13	63.462	46.096	5	30.766	54.029	15	55.958	61.747
18	82.544	58.531	22	88.762	59.603	14	62.39	45.024	6	30.23	55.101	16	55.208	63.034
19	82.222	58.317	23	88.869	59.389	15	59.282	44.595	7	30.552	55.315	17	54.886	59.603
20	83.187	58.102	24	89.512	61.211	16	59.71	47.168	8	31.195	54.994	18	54.243	57.352
21	82.33	57.995	25	87.69	59.496	17	60.675	45.024	9	31.195	54.779	19	56.494	57.888
22	83.938	56.709	26	88.011	60.032	18	65.285	46.739	10	33.339	53.386	20	56.066	57.352
23	86.939	57.138	27	87.904	60.139	19	60.246	44.274	11	33.446	53.386	21	56.602	58.102
24	84.688	57.781	28	88.44	59.603	20	55.851	45.774	12	33.446	53.386	22	54.029	53.171
25	84.045	56.709	29	89.083	59.389	21	51.67	40.2	13	33.661	53.493	23	55.208	50.17
26	81.15	51.456	30	89.19	58.96	22	49.955	36.448	14	37.413	49.955	24	61.318	52.85
27	77.291	51.027	31	89.19	59.067	23	48.99	34.304	15	37.52	49.312	25	61.533	51.242
28	78.256	52.099	32	88.654	57.459	24	49.419	34.518	16	40.95	49.741	26	59.496	50.92
29	80.829	51.349	33	90.048	58.96	25	48.24	35.483	17	42.022	48.776	27	59.174	49.312
30	79.864	50.17	34	90.37	59.067	26	48.026	34.197	18	41.701	47.811	28	58.21	48.347
31	79.971	51.67	35	89.083	58.96	27	49.098	32.16	19	45.131	46.096	29	58.424	47.382
32	78.792	52.206	36	90.262	57.674	28	48.347	31.731	20	46.096	46.632	30	59.496	46.739
33	78.042	53.493	37	90.584	57.566	29	45.989	30.23	21	46.418	45.131	31	60.568	48.562
34	81.043	54.243	38	89.083	59.067	30	45.346	27.765	22	51.242	41.486	32	58.317	49.205
35	83.08	53.6	1	66.678	44.166	31	43.952	24.442	23	51.027	41.486	33	57.03	44.917
36	78.578	51.349	2	63.677	47.597	32	46.418	20.046	24	50.706	42.237	34	56.816	41.701
37	73.646	48.669	3	62.176	49.955	33	45.774	15.973	25	49.098	44.274	35	57.674	38.699
38	72.36	47.49	4	62.819	50.384	34	46.203	10.827	26	49.098	44.059	36	65.178	35.483
1	64.213	66.035	5	60.89	51.456	35	45.346	8.362	27	50.813	44.917	37	64.213	31.195
2	62.283	66.786	6	58.638	50.92	36	46.525	3.109	28	50.277	43.845	38	67.322	22.19
3	60.246	64.534	7	58.746	54.243	1	39.557	51.349	29	50.92	44.274	1	42.022	68.715
4	59.71	64.749	8	60.89	54.779	2	39.771	47.704	30	51.349	44.274	2	44.381	66.142
5	56.173	65.821	9	61.533	54.565	3	42.451	46.632	31	53.493	46.632	3	49.955	61.211
6	55.53	64.856	10	61.962	54.886	4	44.81	45.774	32	51.992	46.954	4	51.456	60.032
7	59.067	60.032	11	60.675	54.136	5	47.382	41.272	33	52.421	46.632	5	50.813	58.102
8	58.96	58.102	12	61.211	54.458	6	48.562	40.629	34	51.992	44.595	6	44.595	53.814
9	59.282	59.818	13	57.674	52.957	7	50.706	36.77	35	52.742	44.702	7	47.918	51.67
10	59.174	60.246	14	58.102	52.85	8	50.491	35.805	36	53.171	45.989	8	48.99	50.277
11	59.603	60.139	15	58.96	50.706	9	50.062	34.626	37	54.029	46.525	9	44.274	47.168
12	62.069	61.104	16	58.531	51.134	10	51.456	34.626	39	55.422	45.238	10	42.13	48.454
13	62.39	61.962	17	58.424	49.098	11	51.242	35.698	1	30.123	42.344	11	41.594	48.776
14	62.176	61.64	18	58.96	47.49	12	54.565	36.234	2	32.482	44.059	12	39.771	48.883
15	66.142	60.89	19	57.245	44.917	13	54.994	35.162	3	37.091	44.595	13	42.022	47.918
16	66.678	60.89	20	54.35	41.808	14	56.816	33.982	4	37.52	45.024	14	45.238	49.634
17	66.893	62.39	21	56.709	41.594	15	57.03	35.054	5	37.949	45.882	15	42.773	53.278
18	67.322	66.893	22	55.958	41.486	16	58.746	33.768	6	37.52	47.811	16	43.738	53.6
19	66.678	64.642	23	55.744	42.558	17	62.819	31.517	7	37.52	47.597	17	45.238	56.494
20	65.821	64.642	24	53.386	34.733	18	63.355	28.515	8	38.378	48.562	18	43.738	57.781
21	63.677	62.819	25	51.027	32.374	19	65.392	27.336	9	38.699	49.419	19	46.632	49.955
22	64.963	63.784	26	50.598	28.194	20	66.893	25.835	10	39.664	50.384	20	48.133	49.312
23	63.355	63.677	27	53.6	31.195	21	66.786	22.726	11	39.342	48.669	21	48.776	50.384
24	63.355	68.072	28	55.958	36.019	22	65.606	21.547	12	41.808	48.776	22	49.419	50.598
25	65.285	69.144	29	57.888	37.627	23	69.037	18.653	13	41.915	51.67	23	49.205	48.669
26	63.891	67.536	30	58.424	39.128	24	70.002	11.899	14	41.915	51.67	24	47.811	48.776
27	65.392	64.213	31	59.496	42.558	25	71.502	12.221	15	42.022	51.778	1	48.776	70.323
28	67.214	64.749	32	58.96	43.523	26	80.507	8.362	16	44.702	52.528	2	49.312	68.179
29	69.573	66.678	33	59.174	46.096	27	84.366	6.218	17	46.418	52.742	3	51.027	68.286
30	70.323	61.211	34	59.71	47.168	28	91.442	4.395	18	46.31	52.742	4	48.99	67.107
31	70.323	61.64	35	60.461	49.741	29	96.48	5.36	19	46.846	51.992	5	46.096	64.32
32	70.109	60.997	36	60.997	50.277	30	101.518	5.146	20	47.918	51.67	6	48.776	63.462
33	70.002	61.318	37	61.533	51.992	1	55.637	57.566	21	48.133	52.528	7	49.955	64.749
34	70.216	61.318	38	60.675	51.242	2	55.744	55.422	22	45.131	52.099	8	49.526	62.605
35	67.965	61.426	1	49.955	33.446	3	54.35	56.602	23	41.379	50.706	9	51.885	63.141
36	68.93	63.248	2	50.384	34.518	4	57.03	57.245	24	41.486	50.92	10	51.242	63.248
37	68.179	63.034	3	55.958	36.019	5	58.317	58.96	25	44.059	51.456	11	51.349	64.963
38	68.608	63.034	4	56.066	36.77	6	57.888	58.424	26	42.13	54.458	1	60.997	62.069
1	59.389	59.174	5	55.744	39.45	7	59.174	59.496	27	41.808	53.814	2	61.211	63.034
2	63.57	54.243	6	57.566	40.95	8	60.89	57.781	28	41.915	54.136	3	60.675	62.498
3	63.998	53.386	7	59.71	43.202	9	60.782	58.102	29	42.88	53.6	4	58.317	61.747
4	69.251	61.533	8	60.89	44.381	10	58.317	58.102	30	45.131	50.384	5	57.138	63.248
5	65.821	65.499	9	61.104	46.739	11	60.997	59.067	31	45.882	50.706	6	55.422	63.462
6	77.077	60.461	10	60.568	45.56	12	60.139	57.03	32	47.597	51.992	7	53.922	62.176
7	93.371	87.261	11	59.71	44.488	13	60.246	57.03	33	46.418	50.384	8	54.243	61.747
1	41.808	64.856	12	58.102	45.024	14	61.318	57.352	34	46.846	50.384	9	54.136	61.533
2	39.664	61.426	13	59.174	42.451	15	60.675	57.459	35	46.846	50.491	10	53.922	61.64
3	41.486	60.675	14	58.638	45.024	16	60.675	58.21	36	46.739	50.277	11	54.029	61.854
4	44.488	58.531	15	57.138	41.594	17	63.677	57.674	37	46.846	51.027	12	53.814	62.069
5	43.309	61.747	16	58.21	44.059	18	62.283	56.494	38	47.168	51.134	13	55.851	63.891
6	45.56	58.317	17	57.245	41.915	19	65.07	56.066	1	42.022	34.09	14	57.888	66.893
7	45.989	56.28	18	56.923	41.808	20	65.07	56.28	2	43.416	33.339	15	60.139	67.965
8	46.096	57.138	19	58.102	44.274	21	64.749	57.888	3	40.522	35.912	16	65.499	67.107
9	42.773	61.104	20	57.995	43.63	22	62.605	57.03	4	40.522	36.019	17	63.462	69.573
10	42.773	66.893	21	58.746	44.702	23	64.106	58.424	5	42.022	37.198	18	60.568	66.035
11	45.453	67	22	58.746	46.096	24	62.283	56.066	6	42.13	37.306	19	60.997	66.893
12	44.81	69.037	23	55.315	45.238	25	63.891	57.995	7	42.344	37.52	20	59.818	67.107
13	49.848	67.107	24	56.816	45.238	26	66.142	53.493	8	40.95	36.448	21	58.96	67
14	52.099	70.538	25	55.53	44.166	27	65.606	53.6	9	40.95	36.448	22	65.821	69.358
15	55.637	70.43	26	57.138	43.309	28	67.214	54.136	10	40.307	39.128	23	72.896	69.358
16	52.742	71.395	27	57.138	43.202	29	64.213	54.35	11	44.488	38.914	24	82.33	69.358
17	55.422	69.251	28	57.245	43.309	30	66.25	53.707	12	42.88	39.45	25	90.691	69.144
18	54.029	74.933	29	54.672	45.024	31	66.25	53.278	13	43.416	41.379	26	83.723	65.928
19	53.922	73.003	30	55.101	44.917	32	65.07	55.851	14	43.523	41.701	27	79.864	66.035
20	56.387	75.469	31	55.744	44.917	33	63.891	51.563	15	44.059	45.667	28	78.256	65.821
21	54.672	77.827	32	56.173	44.059	34	64.427	54.136	16	44.81	48.776	29	78.685	65.606
22	58.424	77.077	33	56.066	43.952	35	66.786	51.778	17	44.488	50.598	30	86.725	68.822
23	56.923	75.147	34	55.101	44.917	36	66.142	51.992	18	47.168	50.491	31	92.085	73.539
24	52.635	74.504	35	51.242	43.952	37	68.179	52.314	19	45.667	50.813	32	93.907	75.254
25	49.634	64.213	36	49.419	41.486	38	65.714	48.669	20	46.525	51.027	33	93.907	75.362
26	47.811	59.389	37	48.669	43.094	1	58.531	57.138	21	46.739	51.456	34	98.517	75.254
27	43.523	52.742	38	48.133	43.094	2	55.851	52.099	22	45.667	49.526	35	99.16	76.326
28	39.664	37.734	1	63.034	58.746	3	50.17	48.026	23	46.203	49.526	36	104.091	75.254
29	36.77	3.216	2	62.712	58.317	4	46.096	46.954	24	45.453	49.634	37	105.485	77.077
1	44.917	71.074	3	62.283	56.28	5	45.453	46.418	25	45.56	50.491	38	105.806	76.862
2	45.667	71.824	4	64.534	58.746	6	46.31	48.883	26	45.882	50.491	1	58.317	48.776
3	49.205	69.466	5	63.784	56.066	7	45.774	46.846	27	45.774	51.242	2	55.422	51.134
4	51.134	68.072	6	63.784	53.922	8	44.381	46.632	28	44.917	50.598	3	57.245	54.565
5	51.134	68.286	7	63.677	52.421	9	45.131	45.346	29	44.81	50.92	4	55.851	54.886
6	50.813	69.894	8	63.141	51.456	10	45.56	40.307	30	45.131	51.027	5	54.779	54.672
7	54.136	65.392	9	62.605	51.778	11	44.274	37.734	31	46.954	49.848	6	54.243	53.493
8	55.315	63.784	10	61.104	49.526	12	43.094	38.163	32	45.131	50.598	7	52.957	55.422
9	55.422	64.749	11	60.461	48.24	13	45.453	38.056	33	45.024	50.491	8	49.526	55.53
10	53.707	65.178	12	59.067	49.741	14	46.203	35.054	34	45.882	49.848	9	50.813	57.03
11	51.992	66.464	13	59.174	48.24	15	46.739	35.59	35	46.096	49.848	10	49.312	60.354
12	51.242	65.714	14	58.531	48.562	16	46.418	26.693	36	46.096	51.134	11	47.597	61.962
13	52.314	66.25	15	59.496	51.242	17	46.418	27.229	37	45.882	52.742	12	45.989	64.213
14	55.53	67	16	60.246	51.242	18	43.416	28.515	38	44.381	51.027	13	49.955	75.147
15	52.314	68.072	17	59.603	51.349	19	43.094	25.406	1	62.176	57.03	14	50.062	78.256
16	52.099	67.107	18	60.246	53.171	20	40.414	22.941	2	61.854	56.709	15	54.136	80.829
17	52.635	67.429	19	66.25	53.171	21	39.557	18.224	3	63.141	59.389	16	53.6	87.368
18	53.922	64.642	20	64.642	52.099	22	41.379	13.507	4	64.427	59.282	17	53.6	97.016
19	53.171	61.426	21	66.25	50.706	23	43.738	11.47	5	65.178	57.781	18	56.173	104.198
20	52.635	62.926	22	62.176	51.563	24	50.17	4.824	6	64.32	59.71	1	56.494	55.422
21	51.992	62.176	23	62.069	51.778	25	52.314	3.752	7	66.25	57.245	2	57.888	53.493
22	51.992	63.141	24	61.854	51.885	26	59.067	3.859	8	66.25	57.245	3	57.566	53.814
23	51.67	62.283	25	61.104	51.992	27	61.318	3.859	9	66.035	58.102	4	57.352	55.958
24	50.17	63.677	26	61.211	51.67	1	75.469	54.994	10	63.998	60.782	5	57.459	56.816
25	49.848	62.069	27	62.176	51.456	2	73.861	54.458	11	64.106	58.531	6	55.851	57.566
26	49.419	62.605	28	62.176	51.992	3	61.533	51.027	12	67	58.531	7	60.782	55.422
27	50.813	61.64	29	60.354	52.421	4	53.493	52.421	13	66.25	59.603	8	58.853	56.173
28	50.062	62.283	30	60.568	52.314	5	49.741	53.814	14	66.786	57.459	9	58.638	52.85
29	50.17	60.675	31	65.821	53.707	6	47.704	51.778	15	72.146	55.101	10	59.174	50.92
30	47.811	60.782	32	68.715	55.851	7	44.702	50.384	16	71.502	55.315	11	60.032	52.099
31	47.918	61.318	33	68.822	56.28	8	41.165	38.592	17	71.931	55.101	12	61.211	53.386
32	49.312	60.354	34	67.643	54.672	9	37.091	27.443	18	72.038	56.494	13	58.853	51.67
33	47.918	60.997	35	68.608	54.136	10	37.52	24.12	19	72.36	54.565	14	58.638	51.67
34	48.347	61.854	36	68.072	54.029	11	38.378	29.802	20	72.467	54.565	15	58.853	51.885
35	47.918	62.069	37	66.035	54.994	12	46.632	40.307	21	72.36	55.208	16	58.853	51.778
36	49.312	62.926	38	63.57	54.565	13	58.746	34.304	22	72.896	54.779	17	58.746	51.992
37	48.883	62.926	1	59.174	47.061	14	69.251	16.294	23	71.824	54.458	18	61.747	38.914
39	50.062	62.069	2	55.958	49.634	15	79.114	2.894	24	72.896	56.494	19	65.178	31.838
1	55.744	62.605	3	57.459	49.419	1	101.733	90.048	25	70.323	56.923	20	64.856	31.946
2	55.422	62.819	4	58.531	49.419	2	77.398	89.726	26	71.824	54.458	21	66.571	31.302
3	57.245	63.355	5	59.925	48.883	3	61.64	95.944	27	72.574	55.422	22	71.931	28.515
4	56.709	63.355	6	56.602	48.99	4	37.734	98.302	28	70.43	55.208	23	74.718	25.085
5	53.386	60.461	7	56.602	48.669	5	24.549	93.586	29	72.467	56.494	24	76.434	33.446
6	54.35	58.746	8	57.674	50.062	6	3.216	85.546	30	71.61	54.458	25	75.898	35.376
7	57.459	56.923	9	57.566	50.277	1	62.176	55.422	31	72.789	55.422	26	76.541	33.018
8	58.317	57.03	10	57.138	50.17	2	63.034	56.387	32	72.789	55.422	27	76.755	33.125
9	57.995	57.138	11	57.138	50.277	3	61.104	54.672	33	71.931	54.565	28	79.864	32.267
10	58.102	56.387	12	58.21	50.813	4	61.104	55.637	34	72.038	54.672	29	77.934	30.552
11	56.28	56.066	13	56.709	48.454	5	59.603	55.637	35	71.931	54.458	30	79.221	30.659
12	63.034	56.709	14	57.674	48.454	6	60.354	55.315	36	73.11	54.994	31	81.258	28.73
13	66.571	53.814	15	58.96	50.92	7	57.888	53.278	37	71.61	56.923	32	84.045	21.976
14	65.285	55.315	16	56.923	53.064	8	57.566	53.922	38	72.574	55.637	33	84.152	19.082
15	65.928	54.029	17	56.602	52.957	9	55.637	52.421	1	60.139	67.75	34	85.653	20.154
16	69.68	49.741	18	59.389	51.67	10	52.742	52.314	2	60.675	69.358	35	78.685	27.443
17	82.866	50.813	19	59.389	51.67	11	51.67	50.384	3	58.317	69.466	36	76.862	29.051
18	92.835	50.277	20	59.174	51.349	12	54.35	52.099	4	59.71	71.074	37	77.506	29.373
19	104.52	35.483	21	57.674	51.992	13	58.853	52.314	5	58.531	71.074	39	77.398	27.765
1	46.632	51.349	22	55.744	52.528	14	64.963	64.106	6	60.461	68.93	1	67	30.552
2	53.386	49.526	23	56.173	52.528	15	66.893	68.072	7	60.032	68.608	2	64.32	29.266
3	67.965	53.171	24	55.637	52.421	16	66.571	67	8	58.424	71.395	3	63.57	38.163
4	68.286	52.635	25	55.851	54.029	17	67.107	66.893	9	60.032	71.931	4	63.891	43.523
5	66.786	52.314	26	56.602	52.528	18	65.392	66.786	10	59.067	72.682	5	59.603	51.027
6	64.32	51.67	27	54.779	55.315	19	67.214	67.429	11	57.459	73.432	6	59.174	57.459
7	64.534	49.741	28	53.278	58.424	20	66.571	66.893	12	54.35	75.79	7	58.96	63.462
8	63.891	50.384	29	52.528	58.746	21	66.893	67.643	13	54.136	74.718	8	56.816	73.754
9	63.891	51.778	30	54.779	55.851	22	67.107	67.214	14	53.386	74.933	9	56.387	80.936
10	64.856	53.386	31	54.243	56.28	23	67.107	66.571	15	53.6	73.11	10	59.067	81.472
11	62.069	49.955	32	54.565	55.208	24	65.07	67.214	16	54.243	72.253	11	60.675	83.402
12	63.248	51.349	33	54.565	54.779	25	65.714	68.286	17	52.421	71.824	12	66.464	85.331
13	65.178	52.099	34	52.314	56.173	26	64.749	67	18	51.563	71.074	13	70.966	90.477
14	67.965	55.101	35	54.35	55.53	27	66.25	66.25	19	52.099	72.467	14	72.253	92.192
15	67.536	53.278	36	55.315	53.707	28	66.035	66.25	20	52.206	72.038	15	77.827	96.694
16	73.432	54.136	37	55.101	55.744	29	65.07	65.714	21	52.528	72.038	16	80.4	99.482
17	71.074	51.778	38	54.672	55.101	30	65.178	66.571	22	53.922	73.218	17	91.87	108.272
18	69.251	50.92	1	53.6	35.805	31	66.25	66.357	23	56.28	75.04	1	61.854	39.45
19	69.787	51.027	2	53.707	38.592	32	67	67.536	24	56.602	75.79	2	63.141	41.486
20	70.109	50.706	3	55.958	39.128	33	66.893	67.429	25	57.03	74.397	3	61.747	42.773
21	70.752	50.384	4	55.101	42.022	34	65.178	65.928	26	57.352	74.826	4	61.854	42.88
22	72.896	47.061	5	51.992	43.738	35	64.749	68.286	27	55.851	75.683	5	61.64	46.632
23	68.822	45.667	6	51.242	42.987	36	64.963	67.429	28	51.67	71.824	6	61.854	48.133
24	70.752	39.235	7	52.957	45.882	37	66.464	70.43	29	54.029	73.968	7	60.461	47.382
25	76.648	19.725	8	52.635	44.81	38	65.07	69.787	30	52.099	74.718	8	60.246	47.382
26	78.47	3.43	9	50.062	47.918	1	99.91	77.077	31	52.099	74.718	9	60.568	48.133
1	48.669	69.251	10	50.17	45.667	2	96.266	66.786	32	52.742	75.576	10	60.461	48.454
2	54.779	65.714	11	47.918	47.49	3	90.262	59.174	33	53.171	75.898	11	60.354	47.597
3	66.893	62.926	12	46.096	48.133	4	73.325	23.584	34	53.064	76.434	12	60.032	50.92
4	82.758	62.176	13	46.846	50.813	5	49.634	12.221	35	53.707	76.326	13	60.461	50.92
5	93.693	57.03	14	47.597	49.526	6	43.309	7.075	36	53.707	76.541	14	60.354	53.922
6	100.125	47.811	15	46.096	48.883	7	43.094	2.894	1	35.376	40.843	15	60.354	54.029
7	106.021	43.63	16	49.526	48.24	8	34.626	2.251	2	35.805	39.45	16	57.245	52.957
8	106.557	46.31	17	48.562	49.848	9	11.149	6.003	3	36.126	40.307	17	57.245	55.101
9	107.2	49.955	18	49.955	49.634	1	64.32	64.32	4	37.198	41.272	18	57.245	55.101
1	76.005	59.067	19	48.669	51.027	2	64.963	64.642	5	37.52	41.379	19	57.245	55.315
2	73.11	57.995	20	49.098	50.277	3	62.283	62.176	6	37.413	42.022	20	57.245	55.315
3	74.718	57.245	21	47.061	49.205	4	62.39	63.891	7	38.163	41.808	21	60.246	56.066
4	73.968	52.314	22	49.741	49.634	5	58.424	58.21	8	37.52	40.95	22	59.603	54.994
5	77.184	51.456	23	48.669	50.384	6	57.888	55.53	9	37.949	41.701	23	57.352	59.603
6	78.578	51.242	24	49.312	51.778	7	57.245	55.315	10	37.413	40.414	24	57.566	59.496
7	81.258	48.669	25	52.635	51.134	8	56.28	54.994	11	39.664	41.808	25	56.494	60.675
8	82.115	48.669	26	53.171	51.242	9	55.53	55.53	12	37.734	41.165	26	57.03	61.64
9	83.938	50.706	27	53.814	51.027	10	57.459	54.994	13	39.664	41.486	27	58.638	61.104
10	85.653	49.955	28	52.099	52.528	11	56.602	54.136	14	37.949	39.664	28	57.888	61.962
11	88.333	50.491	29	54.458	51.992	12	56.28	54.565	15	38.378	40.307	29	57.245	61.318
12	87.582	48.669	30	55.422	53.171	13	56.387	56.173	16	38.592	39.986	30	56.28	61.962
13	90.691	49.526	31	55.53	51.242	14	55.958	55.637	17	38.592	39.771	31	54.35	63.784
14	86.939	50.17	32	54.672	52.314	15	56.387	54.672	18	38.699	39.878	32	55.744	64.106
15	87.368	48.99	33	53.386	51.885	16	54.458	55.744	19	38.378	39.664	33	54.672	62.926
16	82.222	54.243	34	53.814	51.242	17	54.458	55.637	20	38.592	39.986	34	54.565	62.819
17	81.901	52.957	35	55.208	51.992	18	56.494	56.494	21	40.307	38.699	35	54.779	61.533
18	83.294	56.923	36	53.386	52.742	19	51.778	54.672	22	38.485	38.592	36	54.35	62.069
19	85.546	55.744	37	54.136	51.027	20	52.957	53.814	23	39.557	41.165	37	55.315	62.069
20	83.83	56.709	38	54.565	51.242	21	53.171	55.958	24	39.342	40.2	39	56.816	65.821
21	82.758	57.566	1	6.218	53.171	22	51.885	53.064	25	40.2	39.986	1	68.286	57.674
22	84.045	61.747	2	6.968	53.171	23	51.778	53.064	26	40.414	39.986	2	58.317	56.387
23	86.51	64.749	3	9.434	51.563	24	51.349	52.635	27	40.95	40.093	3	55.422	58.424
24	88.654	66.357	4	19.403	51.242	25	41.058	45.024	28	41.701	42.237	4	50.813	59.925
25	87.69	66.893	5	23.37	49.312	26	33.125	36.77	29	41.701	42.558	5	48.133	67.858
26	85.224	63.462	6	24.227	51.242	27	33.125	37.734	30	40.95	39.771	6	44.81	73.218
27	87.69	59.925	7	24.978	52.528	28	35.912	38.592	31	41.594	42.773	7	35.59	76.862
28	91.334	58.21	8	26.05	58.21	29	32.482	39.664	32	41.701	42.987	8	30.874	78.899
29	96.587	56.387	9	28.622	60.032	30	32.803	37.949	33	40.522	40.736	9	26.05	83.187
30	94.765	55.208	10	31.731	60.568	31	33.554	39.45	34	39.021	42.344	10	20.797	90.691
31	91.334	57.995	11	35.162	64.106	32	34.197	39.986	35	39.235	42.666	11	17.259	101.304
32	87.69	63.677	12	36.77	66.678	33	35.805	38.914	36	41.486	41.701	12	16.08	105.806
33	90.048	65.606	13	39.021	67.965	34	36.234	40.629	37	41.594	42.13	13	12.221	106.557
34	91.442	62.498	14	38.056	65.499	35	33.875	33.768	1	62.39	55.958	1	59.71	51.885
35	93.05	62.283	15	37.734	64.213	36	28.837	26.157	2	60.89	58.424	2	59.496	51.349
36	95.622	62.498	16	35.59	62.069	37	26.8	26.157	3	61.533	60.246	3	62.819	54.458
37	93.264	59.603	17	34.09	62.819	38	25.085	24.978	4	60.89	58.424	4	61.962	53.493
38	90.37	57.245	18	32.16	61.962	1	79.65	55.637	5	63.141	60.568	5	64.106	53.171
1	52.635	59.389	19	28.73	60.568	2	78.256	57.888	6	63.462	59.603	6	61.854	53.707
2	46.096	60.461	20	29.158	62.605	3	71.931	53.386	7	63.355	58.96	7	62.926	53.493
3	48.347	62.605	21	32.91	64.427	4	67.643	51.027	8	63.034	58.746	8	62.605	52.85
4	54.35	57.674	22	36.662	67.858	5	67.429	52.314	9	62.819	61.211	9	60.246	50.17
5	62.819	52.742	1	67.107	36.448	6	71.395	50.17	10	63.462	60.782	10	60.354	49.955
6	73.539	37.198	2	65.499	39.45	7	70.323	47.704	11	63.248	61.64	11	62.712	48.883
7	62.283	49.741	3	62.498	42.237	8	70.323	47.704	12	63.998	60.354	12	61.211	50.598
8	52.635	55.208	4	63.998	42.237	9	68.501	49.634	13	63.141	60.997	13	61.211	50.706
9	45.667	56.28	5	64.856	41.915	10	69.68	48.454	14	63.034	62.069	14	56.494	52.314
10	28.194	52.742	6	64.642	42.022	11	67.214	45.56	15	62.605	61.962	15	51.778	47.704
11	16.402	47.061	7	65.928	40.522	12	67.858	42.022	16	62.712	60.461	16	55.422	53.386
12	12.328	41.915	8	64.534	42.344	13	67.858	41.486	17	62.498	61.747	17	54.994	51.778
13	11.792	45.238	9	64.534	41.486	14	67.429	40.307	18	62.39	61.747	18	54.994	51.885
14	12.328	41.808	10	64.32	40.843	15	67.429	39.771	19	62.176	61.747	19	55.101	52.099
15	10.934	40.629	11	64.534	43.094	16	67.536	39.664	20	62.819	60.461	20	55.208	51.992
16	13.4	39.021	12	64.856	43.094	17	67.75	37.627	21	62.819	60.568	21	51.778	50.491
17	9.755	35.376	13	65.606	42.558	18	66.357	39.986	22	63.248	60.997	22	50.92	50.598
18	5.253	26.8	14	65.285	40.629	19	67.643	40.629	23	63.355	61.64	23	52.314	50.17
19	3.323	25.085	15	65.606	41.165	20	67.75	40.629	24	63.141	61.747	24	52.528	51.456
20	3.752	24.227	16	66.25	44.702	21	67.75	40.414	25	63.034	62.605	25	48.454	52.742
21	3.43	27.872	17	66.035	44.381	22	67.858	39.986	26	65.178	61.854	26	49.098	54.779
22	1.715	35.912	18	67.322	44.702	23	66.25	39.45	27	64.856	62.176	27	47.597	53.6
1	60.782	70.323	19	67.536	44.702	24	67.643	39.664	28	64.32	62.283	28	46.739	55.958
2	60.032	70.752	20	67.965	44.81	25	67.965	39.45	29	64.534	62.712	29	46.739	56.066
3	60.782	65.606	21	68.072	45.238	26	67.107	38.914	30	64.963	63.57	30	45.667	58.531
4	61.962	62.498	22	68.501	45.346	27	65.178	40.307	31	65.606	61.962	31	44.381	58.96
5	62.712	62.283	23	67.322	45.667	28	65.285	39.45	32	65.392	61.962	32	43.094	57.03
6	63.248	62.605	24	67.107	45.346	29	65.285	38.914	33	64.427	60.782	33	45.667	61.104
7	65.606	61.533	25	67.536	46.846	30	65.606	38.27	34	64.427	60.354	34	44.381	62.39
8	69.573	62.069	26	67.75	46.739	31	65.499	37.413	35	64.534	62.605	35	44.702	68.394
9	66.035	61.854	27	68.072	46.632	32	65.928	39.342	36	64.749	59.067	36	46.525	71.074
10	65.178	62.926	28	68.715	45.453	33	67.965	39.128	37	66.25	57.888	37	44.488	73.325
11	64.32	62.498	29	68.608	47.168	34	68.179	38.806	38	68.501	56.923	38	45.346	74.718
12	66.357	61.318	30	68.822	47.061	35	67.965	38.27	1	71.61	60.032	1	76.326	50.813
13	70.109	62.819	31	67.858	47.275	36	65.928	37.627	2	70.538	60.997	2	72.467	55.958
14	76.219	63.462	32	69.466	46.525	37	66.571	37.842	3	70.538	61.318	3	73.218	56.709
15	72.253	64.106	33	69.573	47.918	1	78.042	58.21	4	72.789	62.712	4	74.611	57.352
16	73.432	64.427	34	68.179	46.203	2	76.862	56.923	5	71.61	64.534	5	73.754	57.352
17	74.075	63.355	35	68.286	46.096	3	66.786	54.565	6	73.218	62.605	6	72.253	58.746
18	72.253	63.784	36	69.144	47.061	4	59.925	52.85	7	73.539	61.962	7	73.432	58.317
19	71.824	65.714	37	71.931	47.704	5	50.277	56.28	8	71.395	61.533	8	72.253	57.674
20	70.859	65.285	38	69.466	47.061	6	43.845	55.315	9	73.11	62.176	9	74.611	58.96
21	72.682	64.427	1	83.938	29.587	7	39.021	56.923	10	73.754	61.64	10	73.11	59.389
22	72.789	64.534	2	85.653	33.125	8	33.982	55.422	11	72.467	61.64	11	72.896	59.603
23	72.682	64.106	3	85.01	35.269	9	35.054	58.424	12	72.36	63.141	12	73.003	57.995
24	71.288	64.642	4	86.725	40.843	10	35.162	57.03	13	70.645	61.426	13	72.253	57.781
25	72.146	65.714	5	87.904	39.557	11	33.661	59.496	14	71.395	61.962	14	74.504	58.638
26	71.502	64.963	6	91.334	43.523	12	35.805	48.24	15	72.574	60.032	15	75.576	59.389
27	71.502	65.606	7	91.656	44.917	13	33.446	27.229	16	72.896	60.246	16	74.611	58.96
28	71.395	66.035	8	91.978	45.989	14	29.802	2.144	17	73.003	60.568	17	72.682	58.746
29	71.288	66.678	9	91.978	47.061	1	64.106	69.037	18	71.181	62.605	18	72.574	58.317
30	71.074	66.893	10	94.229	51.242	2	50.706	35.054	19	70.752	61.962	19	73.754	61.962
31	70.859	67.214	11	94.658	53.493	3	12.65	4.931	20	70.859	62.926	20	72.467	62.069
32	71.181	66.357	12	93.478	55.208	1	36.448	61.533	21	70.859	63.141	21	73.539	61.64
33	72.574	64.642	13	93.157	58.102	2	35.162	61.426	22	71.931	60.461	22	72.146	62.39
34	72.574	66.786	14	89.941	65.714	3	34.733	61.64	23	71.931	60.354	23	71.181	60.354
35	72.682	65.821	15	88.976	74.075	4	33.768	62.069	24	72.574	60.568	24	71.074	61.211
36	72.789	65.606	16	89.512	72.467	5	36.77	59.925	25	70.323	61.747	25	71.074	59.067
37	71.288	65.821	17	88.011	73.968	6	35.162	58.317	26	71.074	61.318	26	70.43	60.139
38	70.645	67.965	18	89.726	73.861	7	37.091	58.746	27	70.966	61.318	27	71.074	58.96
1	72.253	33.768	19	88.654	72.896	8	35.483	56.387	28	68.608	59.71	27	69.573	57.459
2	67.75	35.054	20	86.082	78.47	9	37.734	58.746	29	68.822	59.389	28	68.822	58.102
3	67.643	37.52	21	86.725	77.72	10	37.413	57.781	30	70.966	59.282	29	68.501	57.566
4	67.214	38.27	22	86.939	76.648	11	35.054	58.96	31	70.859	60.89	30	70.109	60.89
5	67.322	39.342	23	85.867	77.077	12	35.59	59.389	32	70.859	60.461	31	69.358	62.176
6	67.643	39.664	24	86.296	76.434	13	37.52	61.426	33	71.395	60.461	32	70.323	59.71
7	67.643	39.235	25	84.902	76.648	14	36.448	60.675	34	70.645	60.461	33	70.966	59.067
8	68.394	38.27	26	86.832	75.04	15	38.592	58.638	35	69.894	59.496	34	70.109	59.389
9	68.822	38.806	27	86.296	74.826	16	35.269	59.174	36	70.216	59.282	35	69.68	59.174
10	65.392	39.235	28	84.902	72.896	17	35.376	59.174	37	65.606	60.354	36	68.822	61.211
11	65.392	40.629	29	84.688	72.36	18	36.877	54.886	38	63.355	60.032	37	72.574	64.427
12	64.32	40.629	30	84.581	72.36	19	36.877	54.029	1	51.027	67.429	1	46.632	30.23
13	63.677	40.414	31	84.474	72.146	20	36.448	54.029	2	51.992	68.501	2	46.846	35.054
14	63.677	40.95	32	84.581	72.038	21	37.306	53.922	3	52.421	69.466	3	51.456	39.557
15	65.392	40.736	33	84.474	71.824	22	37.306	54.672	4	51.027	67.322	4	49.848	39.771
1	62.926	40.522	34	86.832	73.11	23	38.378	55.315	5	53.278	69.466	5	51.992	40.95
2	62.176	40.629	35	86.618	71.824	24	38.485	55.315	6	53.707	66.25	6	52.528	38.914
3	61.104	42.558	36	87.046	71.824	25	36.984	55.315	7	55.744	67.965	7	51.67	39.128
4	60.246	42.237	37	86.725	72.038	26	39.45	56.066	8	55.208	67	8	53.064	38.378
5	60.89	43.952	38	86.403	71.824	27	41.379	56.602	9	55.637	66.786	9	52.742	39.45
6	62.39	41.165	1	64.534	28.515	28	40.736	55.851	10	53.922	65.714	10	55.315	42.451
7	64.534	41.701	2	63.462	32.482	29	40.2	57.674	11	55.208	66.678	11	54.565	41.808
8	61.854	42.022	3	60.675	34.09	30	39.878	57.995	12	57.995	63.891	12	54.458	42.13
9	62.176	42.451	4	62.498	38.806	31	39.128	57.781	13	56.173	64.32	13	54.672	41.701
10	63.57	41.594	5	62.926	38.378	32	39.128	57.459	14	57.781	66.25	14	55.53	42.773
11	62.39	42.022	6	63.891	41.594	33	38.699	56.494	15	58.531	66.464	15	54.458	41.379
12	62.069	43.094	7	64.106	43.523	34	41.272	51.67	16	57.352	66.357	16	54.565	42.022
13	62.069	40.307	8	62.712	44.595	35	42.773	53.707	17	56.387	65.928	17	53.278	42.022
14	62.605	40.522	9	64.963	46.31	36	42.237	53.814	18	56.816	65.714	18	55.851	42.773
15	62.283	40.629	10	64.963	46.096	37	45.131	52.528	19	56.066	66.357	19	56.602	42.666
16	59.925	41.379	11	64.963	46.096	38	45.346	52.742	20	54.458	66.035	20	54.136	44.274
17	58.638	40.736	12	64.963	45.989	1	49.419	60.675	21	57.781	63.034	21	55.744	46.31
18	58.638	40.522	13	63.891	56.28	2	50.384	57.888	22	57.352	61.962	1	44.702	47.168
19	61.426	41.915	14	64.32	69.358	3	49.205	58.21	23	59.067	63.462	2	30.659	45.346
20	63.355	42.344	15	65.928	72.467	4	47.811	56.923	24	56.709	64.106	3	23.906	40.307
21	64.427	40.2	16	69.894	70.216	5	49.419	58.853	25	57.459	64.534	4	16.08	37.091
22	63.677	38.378	17	69.466	70.216	6	46.846	57.138	26	58.21	64.856	5	16.08	33.125
25	63.462	39.342	18	70.002	70.966	7	39.342	50.17	27	59.282	64.32	6	16.294	29.802
1	42.773	32.267	19	69.466	74.718	8	37.842	49.098	28	57.459	64.642	7	14.472	26.586
2	42.022	31.517	20	69.466	74.397	9	37.091	48.24	29	57.888	64.963	8	14.579	21.762
3	37.949	34.304	21	70.43	76.219	10	35.162	48.24	30	56.816	65.392	9	12.221	20.904
4	36.448	33.446	22	70.645	77.613	11	33.446	47.597	31	52.957	65.714	10	12.328	20.261
5	33.125	33.554	23	69.251	82.33	12	33.554	48.454	32	52.957	65.499	11	10.72	18.117
6	35.59	31.838	24	69.251	82.115	13	34.626	49.419	33	55.101	63.784	12	12.435	20.368
7	32.91	28.301	25	68.93	85.974	14	32.482	47.061	34	54.886	63.462	13	9.862	17.795
8	31.946	27.658	26	69.251	86.618	15	32.16	46.739	35	56.709	64.749	14	10.184	18.331
9	33.446	26.8	27	69.894	87.046	16	33.446	49.312	36	57.245	63.677	15	10.291	19.082
10	33.768	25.299	28	69.358	85.224	17	32.053	47.382	37	57.459	63.248	16	9.755	18.653
11	35.269	24.442	29	69.787	85.867	18	34.09	49.098	38	53.386	63.248	17	10.934	16.402
12	37.52	21.869	30	71.61	85.867	19	29.909	47.704	1	46.525	41.701	18	11.149	16.723
13	37.198	21.762	31	71.61	85.974	20	29.909	47.597	2	46.739	43.63	19	10.398	13.722
14	35.59	23.798	32	71.61	86.296	21	29.909	47.704	3	46.846	41.808	20	11.256	14.043
15	37.734	22.19	33	71.824	88.118	22	27.872	48.133	4	46.846	44.274	21	9.219	14.686
16	35.698	23.798	34	70.859	87.261	1	56.28	58.638	5	47.597	44.381	22	10.291	15.008
17	35.912	24.442	35	71.717	87.69	2	53.278	58.317	6	47.49	43.952	23	10.184	17.795
18	35.805	24.334	36	71.502	87.904	3	50.17	57.995	7	47.061	43.523	24	9.648	12.435
19	35.912	24.334	37	71.074	87.797	4	46.846	59.067	8	47.061	42.987	25	7.826	7.504
20	34.304	25.621	38	71.395	87.904	5	46.203	61.854	9	47.061	42.666	26	3.966	2.787
21	34.304	25.835	1	48.347	49.526	6	50.062	65.499	10	49.098	46.525	1	58.853	54.565
22	34.09	25.621	2	48.883	50.062	7	56.066	69.466	11	49.205	46.525	2	59.603	54.458
23	36.77	28.515	3	48.669	49.419	8	58.424	71.61	12	53.493	49.419	3	56.923	53.6
24	36.234	24.656	4	45.667	51.456	9	59.067	76.648	13	56.28	52.421	4	56.173	55.637
25	40.843	22.834	5	47.382	51.885	10	59.389	76.434	14	56.816	52.742	5	57.352	55.637
26	40.093	27.55	6	49.205	53.6	11	58.424	75.576	15	55.958	52.206	6	59.925	56.923
27	40.843	28.622	7	51.885	60.246	12	59.282	76.541	16	57.888	55.744	7	59.818	54.779
28	41.594	31.838	8	57.674	66.357	13	64.213	78.899	17	57.995	55.744	8	60.246	49.312
29	42.773	30.445	9	57.995	68.394	14	68.286	83.723	18	57.995	55.851	9	60.032	49.312
30	37.198	30.552	10	53.814	67.322	15	70.216	89.083	19	58.102	55.851	10	62.39	53.171
31	35.054	29.694	11	49.955	73.861	16	71.824	90.048	20	59.71	55.422	11	60.032	55.422
32	31.088	27.765	12	50.17	74.611	17	76.112	95.301	21	59.71	55.208	12	57.138	60.032
33	31.195	27.658	13	51.456	75.254	18	77.291	101.411	22	59.71	55.315	13	47.061	73.218
34	36.555	26.586	14	52.314	75.254	19	79.864	102.269	23	61.533	58.317	14	43.523	84.045
35	34.304	26.157	15	54.458	80.936	20	82.866	106.235	24	74.826	62.283	15	40.093	90.262
36	34.304	26.157	16	53.386	84.902	1	73.861	19.618	25	82.758	66.464	16	42.13	94.55
37	34.304	26.157	17	51.242	87.904	2	72.36	20.904	26	81.365	63.034	17	46.632	98.088
39	34.304	27.658	18	45.024	99.374	3	67.214	18.867	27	81.258	62.605	18	52.314	96.587
1	70.216	47.382	19	41.808	105.914	4	56.28	19.403	28	81.365	62.605	19	59.174	98.946
2	68.179	53.493	1	42.88	39.235	5	53.922	19.618	29	81.365	62.498	20	55.315	95.837
3	67.107	56.494	2	39.664	41.486	6	53.493	17.581	30	81.472	62.39	21	52.206	92.621
4	65.178	60.032	3	39.128	40.2	7	50.062	9.648	31	81.365	62.498	22	48.776	95.301
5	65.928	61.854	4	39.235	40.2	8	45.453	3.966	32	85.224	67	23	47.275	91.549
6	66.678	64.642	5	41.379	43.202	1	54.458	45.989	33	86.51	68.501	24	49.205	93.693
7	66.035	65.392	6	40.414	41.808	2	55.101	44.702	34	90.048	70.966	25	49.955	91.656
8	66.464	64.963	7	39.235	39.557	3	53.707	45.238	35	90.048	71.395	26	51.027	93.264
9	65.499	65.928	8	38.485	39.664	4	52.099	45.238	36	88.762	71.181	27	45.56	92.728
10	62.819	66.357	9	36.877	39.342	5	51.456	44.702	37	85.331	69.573	1	51.885	36.555
11	65.07	64.963	10	37.627	38.806	6	53.064	47.382	38	85.331	67.107	2	53.922	37.842
12	65.07	67.107	11	37.413	41.272	7	55.315	47.811	1	58.531	53.493	3	53.278	36.234
13	64.32	66.035	12	38.163	39.771	8	54.994	50.17	2	58.638	54.779	4	51.885	35.912
14	65.178	66.035	13	38.592	41.272	9	57.781	48.026	3	58.102	54.136	5	46.632	37.627
15	63.141	68.072	14	38.914	41.594	10	57.674	48.454	4	59.925	55.208	6	44.274	36.984
16	63.784	67.536	15	38.592	40.95	11	58.317	50.277	5	57.674	57.138	7	48.454	35.054
17	61.64	68.715	16	40.522	42.13	12	59.496	51.456	6	58.102	59.389	8	48.026	31.624
18	61.64	68.822	17	38.592	39.342	13	60.89	51.027	7	57.459	64.749	9	50.062	31.088
19	61.747	67.965	18	39.021	39.128	14	58.96	51.67	8	57.138	68.072	10	53.064	30.766
20	60.461	68.822	19	39.021	39.128	15	58.638	51.563	9	58.638	71.717	11	52.099	32.696
21	58.96	70.859	20	38.914	38.914	16	58.853	51.456	10	60.568	69.573	12	54.35	33.125
22	58.317	70.216	21	38.592	38.914	17	57.459	51.778	11	61.104	67.965	13	53.278	31.946
23	56.28	72.038	22	37.949	41.165	18	58.424	51.778	12	64.534	68.822	14	54.565	34.304
24	57.781	72.038	23	36.234	42.987	19	59.71	50.706	13	64.963	70.002	15	53.278	35.59
25	56.816	70.323	24	35.59	43.094	20	58.21	51.563	14	62.283	71.288	16	55.422	36.234
26	55.53	72.682	25	36.555	41.808	21	57.459	51.67	15	61.318	71.502	17	53.064	38.163
27	54.029	73.968	26	38.699	39.021	22	57.459	49.419	16	60.568	72.467	18	52.099	36.448
28	54.029	74.075	27	36.019	41.058	23	60.032	49.419	17	62.926	72.789	19	53.6	38.699
29	53.171	75.469	28	36.126	41.379	24	59.389	50.491	18	61.104	73.003	20	53.171	37.198
30	52.528	77.827	29	38.914	42.237	25	59.818	51.349	19	59.603	73.968	21	56.387	36.448
31	54.029	79.114	30	36.448	42.022	26	58.317	50.598	20	62.176	75.254	22	53.922	34.84
32	51.992	77.934	31	38.485	44.059	27	58.853	53.171	21	63.891	73.861	23	54.565	32.803
33	52.635	79.114	32	37.413	43.63	28	60.675	52.206	22	62.712	73.11	24	55.53	30.016
34	51.349	77.398	33	37.306	43.63	29	60.461	50.17	23	62.926	74.182	25	57.566	31.088
35	52.957	79.221	34	38.27	43.845	30	59.603	50.92	24	62.069	76.219	26	59.389	27.122
36	54.672	78.578	35	38.163	44.059	31	61.64	50.598	25	61.64	76.648	1	69.358	44.381
37	54.565	78.149	36	38.27	43.845	32	61.64	52.635	26	58.746	77.934	2	65.821	47.061
38	54.672	78.792	37	38.163	43.738	33	65.07	58.424	27	58.853	79.65	3	64.106	45.774
1	53.278	66.464	38	38.378	40.843	34	65.392	62.283	28	58.21	79.971	4	62.283	45.882
2	53.171	66.25	1	51.67	49.741	35	66.571	62.605	29	58.102	78.685	5	60.675	44.059
3	54.35	69.251	2	49.312	50.17	36	67.322	63.998	30	56.923	76.97	6	58.638	45.346
4	55.958	67.429	3	49.526	51.778	37	66.035	68.715	31	58.102	75.147	7	57.138	45.882
5	54.779	70.645	4	50.277	51.242	38	64.32	65.714	32	59.282	78.899	8	54.458	45.346
6	55.53	68.822	5	49.634	52.206	1	67.107	52.85	33	62.498	76.434	9	54.779	45.024
7	54.672	69.787	6	50.491	51.027	2	64.856	55.851	34	67.536	75.469	10	56.387	43.416
8	54.029	71.181	7	51.027	48.883	3	64.963	55.744	35	67.75	74.611	11	56.816	47.168
9	55.315	69.68	8	51.885	49.098	4	65.392	55.637	36	70.323	71.502	12	55.637	45.024
10	55.53	68.93	9	50.062	51.242	5	65.821	55.851	37	69.251	73.754	13	57.03	47.168
11	54.565	69.68	10	51.885	49.419	6	65.285	55.851	39	70.216	73.539	14	54.458	45.667
12	56.387	67.965	11	49.312	49.526	7	65.606	55.851	1	44.381	60.461	15	51.456	48.026
13	55.315	69.251	12	51.885	48.99	8	65.714	55.53	2	45.774	60.997	16	52.421	45.989
14	55.744	68.715	13	49.419	49.205	9	65.392	55.851	3	45.56	59.71	17	52.421	46.954
15	55.208	69.251	14	50.598	51.456	10	65.714	55.53	4	44.595	58.96	18	52.635	46.096
16	54.672	68.715	15	50.062	51.456	11	65.821	55.422	5	45.667	58.96	19	51.778	46.739
17	54.672	70.002	16	49.848	51.456	12	65.392	55.744	6	46.954	57.245	20	53.064	46.954
18	55.208	69.894	17	50.706	52.099	13	62.498	57.245	7	46.203	53.278	21	53.814	45.882
19	55.315	71.717	18	50.813	52.099	14	62.605	57.245	8	43.738	55.101	22	52.099	47.382
20	57.566	80.722	19	52.206	52.635	15	62.712	57.245	9	42.022	53.6	23	52.635	48.347
21	56.494	85.01	20	55.101	53.493	16	62.712	57.138	10	40.95	49.634	24	52.528	48.454
22	54.886	88.762	21	54.994	54.565	17	62.819	57.138	11	38.806	48.24	25	49.419	46.846
23	53.6	94.872	22	54.779	55.208	18	62.819	57.138	12	40.736	44.274	26	48.669	45.238
24	52.206	96.158	23	54.35	54.672	19	62.819	57.245	13	36.234	46.096	27	49.741	47.811
25	52.314	98.731	24	53.064	52.314	20	62.926	57.03	14	36.984	44.488	28	51.456	46.096
26	50.706	99.482	25	52.528	50.706	21	63.355	56.709	15	37.198	43.63	29	51.134	46.954
27	50.384	101.518	26	52.528	52.742	22	63.57	57.03	16	37.091	44.595	30	49.205	44.274
28	50.598	105.056	27	51.67	51.242	23	63.034	57.138	17	33.661	41.808	31	46.846	42.13
29	50.277	106.664	28	51.563	47.168	24	63.462	56.816	18	33.554	43.63	32	48.883	42.558
30	49.955	106.986	29	51.242	47.061	25	62.926	57.138	19	31.088	40.414	33	46.954	42.88
1	54.029	57.138	30	48.454	45.882	26	62.926	57.03	20	32.16	39.235	34	47.382	45.882
2	54.136	56.173	31	51.456	44.059	27	63.355	57.138	21	33.232	40.629	35	47.168	45.774
3	55.208	55.744	32	48.669	43.523	28	63.034	57.138	22	30.338	37.734	36	47.168	45.667
4	55.422	55.637	33	51.027	45.346	29	63.034	57.03	23	29.802	37.091	37	47.061	45.667
5	54.243	57.245	34	48.562	42.344	30	62.926	57.03	24	29.373	36.234	38	45.238	42.987
6	52.421	57.566	35	48.454	41.808	31	63.034	57.138	25	31.517	36.448	1	63.034	51.885
7	52.314	59.71	36	48.99	41.915	32	63.034	57.138	26	34.411	36.877	2	60.89	52.742
8	54.029	57.459	37	50.384	41.486	33	63.141	57.138	27	31.731	37.091	3	57.245	50.384
9	52.957	56.923	38	50.706	41.058	34	63.141	57.138	28	32.589	34.518	4	53.707	51.563
10	52.742	56.816	1	56.816	60.354	35	63.141	57.138	29	31.302	33.446	5	54.565	52.421
11	52.85	57.888	2	56.28	59.71	36	63.141	57.03	30	32.696	32.589	6	55.53	51.456
12	54.779	57.566	3	59.067	59.925	37	63.141	57.138	31	31.088	35.162	7	49.955	49.741
13	53.6	56.923	4	58.853	60.782	1	46.418	42.773	32	35.162	32.589	8	50.384	49.312
14	53.171	57.245	5	58.746	62.39	2	45.453	41.058	33	35.162	33.125	9	48.99	50.598
15	53.278	57.888	6	60.139	63.998	3	47.275	42.13	34	33.982	32.91	10	49.419	49.526
16	54.458	57.781	7	60.354	63.998	4	45.024	41.594	35	33.768	31.731	11	47.811	49.741
17	55.101	59.389	8	60.675	63.784	5	43.523	40.522	36	34.304	29.587	12	45.667	46.954
18	55.315	60.246	9	62.605	65.606	6	42.666	37.091	37	33.982	34.626	13	46.525	47.597
19	55.422	60.139	10	62.39	69.251	7	41.701	35.912	38	33.661	32.267	14	46.739	48.24
20	54.458	60.997	11	61.962	73.003	8	44.059	37.52	1	72.789	56.923	15	47.061	47.49
21	54.672	61.211	12	61.854	77.506	9	42.237	36.984	2	69.573	55.744	16	51.349	46.525
22	56.066	60.89	13	62.176	75.576	10	43.845	35.912	3	68.072	55.315	17	48.99	45.238
23	57.781	57.03	14	63.57	76.541	11	44.702	38.485	4	70.645	56.173	1	56.066	56.387
24	61.318	53.707	15	63.891	76.541	12	42.88	37.306	5	69.573	56.173	2	57.138	58.424
25	63.677	50.062	16	65.392	76.434	13	38.485	37.198	6	69.894	55.422	3	57.674	58.317
26	64.427	47.918	17	66.357	74.933	14	35.698	35.376	7	71.824	53.922	4	56.602	57.352
27	65.928	46.31	18	69.037	77.72	15	30.981	34.626	8	70.538	51.456	5	53.386	59.067
28	62.926	42.88	19	68.822	75.576	16	33.554	35.162	9	70.645	51.778	6	54.994	60.139
29	54.886	43.202	20	71.181	76.326	17	33.125	30.445	10	72.253	53.922	7	54.136	59.71
30	51.992	45.024	21	72.253	74.075	18	31.41	30.552	11	72.253	54.136	8	55.315	59.818
31	50.384	43.202	22	76.541	62.39	19	31.624	30.23	12	76.219	53.171	9	56.602	58.853
32	51.67	46.203	23	75.469	43.523	20	30.981	29.266	13	73.646	52.635	10	57.781	60.568
33	52.85	49.098	24	74.504	36.234	21	30.659	32.803	14	72.896	54.029	11	57.781	60.461
34	54.565	47.811	25	73.861	30.552	22	28.837	32.91	15	72.896	53.922	12	58.638	60.354
35	54.243	46.954	26	73.218	28.086	23	29.266	33.768	16	72.896	54.029	13	58.96	58.96
36	52.421	46.954	27	77.827	28.622	24	28.944	34.197	17	72.896	54.029	14	57.674	57.459
37	52.957	42.13	28	76.648	25.085	25	28.086	34.626	18	72.896	53.922	15	58.853	57.674
38	52.421	42.773	29	76.648	24.227	26	27.979	33.125	19	72.682	53.922	16	56.602	57.352
1	50.062	61.211	30	77.398	20.368	27	28.837	32.696	20	72.789	54.029	17	57.138	54.886
2	53.278	60.246	31	77.827	17.795	28	30.659	31.302	21	73.003	54.243	18	57.352	57.674
3	54.029	60.675	32	86.832	11.792	29	38.699	32.053	22	73.003	54.029	19	55.958	55.851
4	55.637	64.106	33	95.837	6.861	30	47.168	29.587	23	72.789	54.136	20	53.707	57.674
5	53.064	64.749	34	93.8	5.253	31	47.275	28.408	24	72.896	54.029	21	55.208	56.816
6	50.92	66.786	35	93.478	3.645	32	51.242	29.802	25	73.003	54.243	22	54.35	57.245
7	49.955	65.606	36	98.302	3.109	33	48.562	30.123	26	73.11	54.243	23	51.778	59.174
8	53.922	63.462	1	62.498	47.382	34	49.312	26.371	27	72.896	54.029	24	52.099	60.246
9	54.35	62.176	2	57.674	50.491	35	47.597	24.763	28	69.68	55.958	25	54.029	57.888
10	55.958	62.069	3	55.744	59.174	36	47.704	24.12	29	69.573	55.958	26	54.029	57.995
11	53.064	60.246	4	53.814	66.678	37	50.706	23.37	30	66.786	58.424	27	53.171	56.387
12	53.171	60.032	5	52.85	69.144	38	52.421	21.654	31	65.499	60.246	28	52.206	58.102
13	49.955	57.459	6	52.206	68.179	1	51.885	43.952	32	63.462	60.89	29	54.35	60.139
14	40.093	53.386	7	50.92	62.712	2	50.491	45.238	33	60.246	61.747	30	54.35	60.032
15	37.091	53.493	8	48.347	55.315	3	48.99	47.597	34	59.389	61.211	31	53.707	60.354
16	34.84	52.85	9	47.168	52.635	4	51.242	47.704	35	56.173	62.069	32	53.814	59.174
17	32.696	51.027	10	47.918	42.773	5	49.419	48.883	36	49.419	63.784	1	51.027	26.586
18	31.088	48.669	11	42.344	28.73	6	52.528	46.31	37	53.6	63.57	2	51.885	26.478
19	35.162	49.634	12	46.846	11.578	7	53.6	46.31	38	53.386	63.355	3	51.349	27.014
20	40.093	51.456	13	47.704	2.144	8	56.923	42.666	1	56.709	57.566	4	51.027	26.586
21	41.915	52.421	1	77.72	36.234	9	57.459	42.666	2	55.958	57.995	5	51.992	27.765
22	42.666	54.029	2	75.683	41.486	10	57.245	42.773	3	55.637	58.317	6	51.885	26.907
23	42.022	53.493	3	76.434	44.917	11	57.674	42.344	4	56.066	59.067	7	52.528	28.086
24	44.595	54.672	4	75.254	45.56	12	60.139	42.13	5	55.851	60.997	8	50.062	30.445
25	36.126	62.498	5	75.79	48.669	13	59.818	42.666	6	55.208	59.818	9	49.312	30.766
26	28.086	72.253	6	75.04	52.099	14	59.389	43.094	7	55.101	59.818	10	49.634	30.123
27	23.584	73.646	7	73.539	56.387	15	58.853	43.202	8	55.101	60.139	11	49.955	29.694
28	20.69	80.4	8	73.325	63.355	16	57.995	42.13	9	56.066	61.318	12	49.955	31.088
29	13.507	88.976	9	70.645	68.072	17	60.139	41.915	10	55.315	60.89	13	50.17	28.944
30	17.474	87.261	10	66.464	61.426	18	58.531	43.952	11	55.101	61.318	14	50.384	30.016
31	32.589	77.398	11	66.142	65.606	19	57.995	44.381	12	57.781	60.568	15	51.349	30.874
32	45.453	63.784	12	64.963	67.643	20	59.389	42.88	13	56.28	61.104	16	50.277	29.694
33	51.67	58.424	13	63.462	66.786	21	57.459	44.166	14	56.602	61.747	17	50.17	30.123
34	52.742	58.853	14	65.178	67	22	59.603	44.166	15	56.28	63.034	18	48.24	30.874
35	52.099	59.925	15	65.285	66.678	23	57.781	43.309	16	56.28	61.211	19	48.99	28.622
36	52.099	61.426	16	64.749	63.248	24	59.174	42.88	17	56.28	61.64	20	48.776	33.232
37	56.923	60.89	17	61.64	63.57	25	59.925	42.558	18	56.066	61.533	21	47.382	31.946
38	57.03	58.317	18	62.498	60.997	26	61.854	44.166	19	57.674	61.747	22	47.811	31.41
1	58.638	45.882	19	63.034	63.677	27	61.318	44.274	20	57.566	61.854	23	49.098	29.158
2	55.53	47.061	20	71.502	58.102	28	61.64	44.059	21	57.674	62.176	24	48.669	29.158
3	54.35	48.454	21	70.002	57.674	29	63.034	44.274	22	55.637	61.64	25	48.776	29.266
4	49.526	52.314	22	71.181	57.352	30	63.57	43.952	23	55.851	61.747	26	48.776	30.445
5	47.49	51.885	23	73.754	58.638	31	63.57	42.237	24	55.851	62.069	27	48.669	30.874
6	45.882	53.707	24	76.648	57.245	32	63.891	44.381	25	57.03	61.962	28	46.954	28.73
7	44.488	52.314	25	75.04	58.96	33	62.069	42.773	26	57.245	61.854	29	48.883	29.158
8	43.738	53.707	26	76.005	56.173	34	63.462	43.738	27	57.352	63.248	30	45.989	30.016
9	44.917	54.886	27	76.648	53.814	35	62.176	43.309	28	56.602	62.819	31	45.882	28.515
10	40.414	63.034	28	77.184	54.565	36	63.677	42.022	29	56.28	63.034	32	47.382	28.301
11	37.734	65.821	29	82.758	53.814	37	64.213	44.166	30	56.387	63.248	33	47.168	28.301
12	39.128	63.998	30	83.402	52.206	1	71.502	54.243	31	56.816	63.355	34	48.454	28.086
13	39.235	62.712	31	80.829	51.992	2	67.858	51.778	32	55.53	63.677	35	48.454	28.408
14	41.058	63.141	32	85.438	52.742	3	68.394	51.885	33	55.53	64.642	36	50.062	28.194
15	39.021	64.427	33	84.902	54.779	4	70.002	52.742	34	56.494	62.819	1	50.277	52.528
16	35.698	70.966	34	94.336	54.565	5	70.002	54.458	35	55.637	64.213	2	48.99	54.994
17	29.802	81.043	35	96.373	55.101	6	63.248	46.846	36	55.637	63.891	3	50.384	54.35
18	19.939	95.515	36	99.267	54.994	7	64.213	46.632	37	57.459	65.928	4	48.669	55.101
19	15.115	104.198	37	95.515	55.315	8	67	47.704	38	57.566	66.035	5	50.384	54.243
20	12.221	106.128	38	93.693	54.672	9	66.25	48.669	1	13.186	15.651	6	50.17	54.886
21	7.397	106.771	1	67.643	64.963	10	65.499	48.776	2	13.4	15.544	7	51.67	54.779
22	8.576	106.986	2	69.573	66.571	11	67.214	47.061	3	13.722	15.33	8	51.563	56.066
23	9.434	106.986	3	68.286	66.25	12	67.322	47.918	4	14.15	14.043	9	53.493	57.138
1	63.677	57.781	4	67.643	65.285	13	66.678	48.454	5	12.971	15.973	10	55.208	54.136
2	61.104	59.174	5	68.608	61.747	14	65.606	47.382	6	13.293	15.33	11	55.53	53.171
3	61.962	60.782	6	66.786	62.498	15	66.357	48.669	7	13.186	15.437	12	50.491	54.994
4	61.854	60.354	7	65.606	63.141	16	65.178	49.312	8	13.293	15.544	13	54.029	53.922
5	62.39	61.104	8	65.285	61.426	17	67.322	48.669	9	11.149	14.365	14	52.635	53.171
6	63.355	60.675	9	64.534	61.318	18	65.07	49.098	10	12.971	13.293	15	51.242	51.67
7	62.498	63.034	10	62.069	59.496	19	67.429	48.669	11	13.186	16.723	16	51.885	54.243
8	60.997	64.963	11	64.856	58.638	20	66.678	47.704	12	12.006	16.616	17	50.706	54.779
9	63.998	69.037	12	64.642	56.923	21	67	42.13	13	13.829	16.08	18	49.955	54.672
10	64.749	70.538	13	62.176	52.206	22	68.501	41.915	14	15.222	16.509	19	48.454	57.03
11	63.677	66.571	14	59.603	49.098	23	67.107	42.666	15	13.507	14.579	20	48.454	57.138
12	66.357	67.536	15	45.131	39.021	24	68.715	43.952	16	15.866	13.722	21	47.811	55.958
13	67.107	65.606	16	36.877	35.376	25	69.037	43.738	17	15.115	14.472	22	49.098	56.816
14	67	69.68	17	25.514	21.976	26	68.286	43.845	18	17.045	12.864	23	47.168	56.602
15	70.002	71.61	18	16.723	17.581	27	66.893	42.666	19	15.866	13.293
16	72.038	70.752	19	3.43	19.832	28	68.179	44.274	20	17.152	14.686
17	70.859	70.43	1	58.853	54.886	29	66.678	44.381	21	15.008	15.33
18	72.789	71.288	2	58.853	56.923	30	66.678	44.274	22	14.365	16.08
19	76.005	72.682	3	60.782	59.282	31	68.715	44.595	23	15.866	15.758
20	76.648	74.397	4	62.926	59.389	32	68.822	41.594	24	16.402	15.222
21	78.578	76.541	5	65.285	60.246	33	68.072	42.666	25	16.723	14.579
22	77.72	74.504	6	65.499	58.531	34	68.072	42.237	26	15.866	15.973
23	81.901	75.469	7	66.035	58.96	35	69.573	41.486	27	16.08	14.794
24	82.544	74.933	8	66.786	60.568	36	69.466	40.736	28	14.472	14.365
25	89.726	78.363	9	66.357	62.283	37	68.286	41.165	29	13.614	14.579
26	91.12	80.614	10	66.571	62.283	38	67.322	39.342	30	12.221	16.723
27	94.872	81.686	11	66.357	61.854	1	63.034	40.522	31	12.328	18.546
28	99.053	82.222	12	65.392	61.747	2	65.821	49.741	32	13.507	21.869
29	99.91	82.866	13	66.035	61.104	3	65.606	51.456	33	16.83	21.226
30	103.341	83.723	14	66.786	61.533	4	66.678	59.496	34	17.902	21.226
31	105.056	81.15	15	65.821	61.426	5	64.856	62.605	35	21.547	21.44
32	106.557	82.222	16	66.142	62.498	6	65.178	63.462	36	27.658	24.334
33	106.557	84.045	17	66.25	62.605	7	63.57	65.928	37	27.55	25.728
34	105.27	82.222	18	66.25	61.318	8	69.144	74.611	39	22.834	23.37
35	104.306	86.189	19	65.606	63.248	9	70.966	75.79	1	35.483	56.387
36	100.125	85.224	20	65.178	60.89	10	67.75	74.397	2	35.483	55.958
37	105.163	86.403	21	63.248	61.747	11	60.354	77.613	3	35.805	57.674
39	103.234	86.296	22	64.534	61.64	12	60.246	76.112	4	38.27	60.246
1	61.747	69.68	23	63.57	62.176	13	61.64	73.754	5	39.021	58.531
2	63.355	67.536	24	63.355	62.712	14	64.427	69.251	6	38.914	59.603
3	63.462	69.573	25	66.786	62.498	15	67	65.392	7	39.771	59.818
4	62.176	70.323	26	66.464	60.139	16	67.536	58.102	8	39.664	59.818
5	64.642	68.501	27	65.821	60.461	17	67.322	59.389	9	40.093	59.282
6	63.891	69.358	28	67.536	60.461	18	63.355	70.966	10	39.771	59.71
7	67.214	67.536	29	70.216	61.962	19	63.998	69.68	11	40.093	60.246
8	66.571	64.427	30	72.789	62.283	20	65.07	70.966	12	39.878	58.317
9	66.142	63.891	31	73.968	61.962	21	63.034	76.112	13	39.557	60.89
10	66.357	64.856	32	69.037	61.318	22	59.71	75.576	14	39.342	61.104
11	68.93	65.606	33	66.678	61.64	23	50.813	74.29	15	39.128	60.997
12	66.142	62.283	34	66.571	60.782	24	49.741	73.861	16	39.021	58.746
13	67.858	64.642	35	67.858	61.211	25	57.138	77.934	17	40.414	60.675
14	64.427	69.787	36	67.214	60.997	26	64.856	78.256	18	40.629	60.032
15	60.032	76.97	37	68.394	60.89	27	65.499	83.616	19	39.342	58.96
16	58.102	80.293	38	67.107	60.354	28	70.323	85.867	20	40.414	60.782
17	57.781	82.651	1	55.53	57.995	29	70.216	86.189	21	40.843	61.104
18	58.424	81.258	2	54.35	57.674	30	70.216	84.152	22	39.664	58.96
19	56.709	83.294	3	56.066	57.781	31	68.608	86.189	23	39.664	59.389
20	55.637	83.402	4	55.315	57.245	32	69.573	83.509	24	40.093	59.282
21	55.53	86.189	5	56.816	56.494	33	71.502	74.933	25	38.699	59.174
22	55.208	87.154	6	56.28	58.638	34	72.038	74.826	26	39.45	60.139
23	53.707	88.762	7	55.958	58.531	35	72.896	74.504	27	39.235	58.96
24	55.53	85.117	8	56.709	58.21	36	73.003	73.968	28	40.414	60.246
25	53.6	82.115	9	55.637	58.638	37	77.291	77.934	29	40.093	58.746
26	55.422	78.792	10	54.994	58.96	38	77.291	78.363	30	39.878	60.89
27	52.742	77.291	11	52.314	57.888	1	84.366	28.086	31	40.522	60.461
28	52.099	74.075	12	52.957	57.138	2	85.76	45.774	32	41.594	59.174
29	49.848	68.394	13	55.422	57.781	3	87.69	59.496	33	43.309	60.782
30	44.488	64.642	14	52.528	60.461	4	88.547	64.963	34	43.952	58.96
31	42.344	62.819	15	52.742	59.925	5	100.982	64.427	35	46.203	58.21
32	40.522	59.603	16	54.565	60.139	6	106.45	61.318	36	44.702	58.531
33	39.45	55.958	17	54.886	59.496	1	37.413	47.168	37	46.739	59.925
34	38.914	54.886	18	52.957	56.816	2	40.843	53.814	39	41.486	58.746
35	38.378	52.742	19	54.565	56.816	3	46.739	57.674	1	54.029	35.269
36	36.984	51.242	20	54.136	57.459	4	51.885	61.533	2	55.208	36.662
37	36.234	49.848	21	54.136	57.459	5	52.206	63.57	3	55.101	37.306
39	34.518	47.704	22	53.064	60.675	6	48.454	64.534	4	55.208	37.734
1	67.214	57.888	23	51.67	60.997	7	45.131	70.216	5	55.101	37.627
2	61.533	65.178	24	50.598	64.32	8	43.416	73.861	6	55.422	37.734
3	58.746	65.392	25	50.598	63.034	9	45.346	79.006	7	55.315	37.627
4	57.888	70.109	26	50.277	63.57	10	47.275	79.757	8	55.637	37.842
5	44.059	91.656	27	49.955	63.891	11	47.811	81.472	9	55.53	37.734
6	40.2	103.662	28	50.062	64.963	12	47.382	82.115	10	55.744	37.949
7	39.235	105.806	29	50.598	64.534	13	48.776	81.472	11	55.851	37.949
8	47.168	108.058	30	51.027	64.642	14	49.312	85.974	12	55.851	37.842
9	64.963	106.342	31	51.67	68.394	15	49.955	84.902	13	55.958	38.056
10	80.507	102.483	32	55.101	68.822	16	50.277	83.616	14	56.066	37.842
11	82.222	105.806	33	55.958	67.965	17	50.706	76.326	15	56.066	37.842
12	86.939	97.338	34	53.6	69.894	18	47.061	75.469	16	59.603	37.734
13	84.045	99.482	35	54.029	70.216	19	47.061	71.717	17	57.566	40.843
14	92.835	106.342	36	52.742	70.323	20	49.312	73.218	18	59.603	38.485
1	48.669	81.794	37	55.315	70.109	21	47.704	74.611	19	60.032	39.342
2	50.062	78.792	38	53.6	73.539	22	48.133	75.147	20	59.818	37.842
3	46.203	74.182	1	67.75	68.501	23	49.955	75.04	21	60.032	39.557
4	44.81	72.038	2	66.678	69.894	24	50.277	75.04	22	58.96	37.306
5	42.88	70.538	3	62.605	74.182	25	50.17	75.898	23	60.032	37.734
6	43.416	65.928	4	56.923	83.402	26	53.386	74.075	24	59.389	37.413
7	39.021	62.39	5	50.706	90.155	27	54.243	75.254	25	59.818	36.877
8	36.341	56.494	6	39.664	89.941	28	63.998	70.002	26	58.424	36.984
9	29.802	53.493	7	36.555	88.44	29	78.042	71.824	27	58.638	37.091
10	27.979	46.31	8	34.197	91.549	30	91.87	70.323	28	57.138	38.163
11	29.909	44.381	9	37.842	91.013	1	33.875	89.19	29	58.746	38.056
12	29.158	42.773	10	40.522	88.762	2	35.162	83.938	30	57.566	37.198
13	23.906	41.058	11	40.093	92.514	3	38.699	76.862	31	57.138	38.592
14	19.51	43.523	12	40.843	101.09	4	39.342	77.506	32	57.352	38.27
15	9.434	48.562	13	41.058	103.234	5	41.594	76.648	33	57.459	39.128
16	4.395	51.134	14	42.451	103.341	6	39.021	76.005	34	58.102	37.198
17	5.253	53.064	15	40.522	100.875	7	41.272	74.611	35	58.638	38.378
18	5.682	52.421	16	37.949	99.16	8	40.307	71.502	36	59.174	38.485
19	6.11	54.458	17	36.019	95.408	9	40.736	70.645	37	57.566	40.522
20	4.824	54.779	18	32.16	98.195	10	41.594	70.645	38	58.317	39.557
21	6.968	55.851	19	25.085	99.16	11	44.595	67.643	1	53.386	60.782
22	4.074	55.637	20	23.048	106.342	12	49.634	68.286	2	51.885	60.246
23	3.538	57.781	21	6.432	106.342	13	49.312	68.286	3	54.029	59.067
24	3.966	57.566	22	16.938	102.698	14	47.597	66.464	4	50.813	61.426
25	7.504	59.389	23	21.44	96.48	15	49.741	67.643	5	52.85	62.39
26	6.218	55.958	24	16.616	92.085	16	51.885	68.072	6	50.813	62.605
27	6.432	56.173	25	15.33	91.227	17	51.563	70.323	7	50.598	62.498
28	7.826	55.208	26	13.829	89.298	18	54.136	70.43	8	52.314	63.141
29	8.254	54.565	27	9.755	85.117	19	52.528	72.36	9	52.099	63.034
30	7.611	56.816	28	6.539	89.298	20	53.171	72.038	10	51.992	63.462
31	8.683	55.851	29	2.787	100.768	21	52.528	72.789	11	52.635	64.106
32	11.685	57.888	30	2.358	80.936	22	52.314	71.824	12	54.994	64.106
33	10.184	59.496	1	59.71	67.536	23	52.85	72.896	13	56.28	64.32
34	9.326	59.603	2	60.032	68.822	24	53.493	71.395	14	54.243	64.749
35	11.149	60.89	3	60.675	64.749	25	53.814	74.182	15	54.136	63.248
36	9.755	63.677	4	58.531	64.749	26	53.171	74.504	16	55.637	65.178
37	11.47	63.462	5	60.032	65.928	27	53.278	74.826	17	55.422	64.749
38	10.613	62.39	6	61.104	66.357	28	53.6	74.933	18	52.957	64.213
1	75.362	38.378	7	62.069	66.786	29	55.637	73.861	19	54.136	62.819
2	73.325	38.27	8	62.926	66.893	30	54.029	75.362	20	54.886	65.392
3	70.645	39.771	9	62.926	67.214	31	54.35	74.718	21	54.565	65.178
4	69.358	39.45	10	61.426	65.392	32	54.243	74.718	22	53.278	62.926
5	67.965	37.842	11	60.997	66.035	33	54.35	75.04	23	53.386	62.498
6	67.322	37.198	12	61.104	66.035	34	56.494	74.397	24	52.85	64.427
7	66.464	37.091	13	61.533	66.678	35	56.494	73.539	25	52.421	63.677
8	65.606	36.77	14	59.71	65.821	36	55.744	73.754	26	51.992	64.642
9	64.427	36.555	15	60.139	66.464	37	54.136	75.147	27	52.85	64.213
10	64.213	35.805	16	60.139	66.464	38	55.744	74.933	28	52.742	63.891
11	62.176	36.234	17	60.246	66.25	1	73.968	55.637	29	51.885	65.178
12	62.069	35.698	18	59.925	65.928	2	71.61	55.744	30	52.957	64.963
13	61.64	36.019	19	58.96	65.499	3	71.717	54.458	31	52.957	65.928
14	62.283	35.483	20	59.067	64.427	4	71.931	55.208	32	53.6	63.998
15	62.176	34.947	21	58.853	64.642	5	71.824	57.245	33	53.814	66.035
16	62.926	34.733	22	57.459	64.106	6	73.325	57.459	34	53.278	65.821
17	62.176	34.518	23	58.317	64.963	7	73.539	56.387	35	53.386	65.821
18	62.069	34.09	24	58.531	64.534	8	70.323	57.781	36	53.386	63.462
19	61.426	34.518	25	58.21	64.963	9	70.323	57.781	37	55.422	64.534
20	58.853	32.267	26	58.746	65.714	10	70.109	57.566	39	55.958	63.034
21	59.067	31.946	27	58.746	65.606	11	70.109	57.566	1	56.923	53.922
22	59.925	32.374	28	58.96	66.035	12	71.074	55.101	2	56.387	54.029
23	62.39	33.982	29	58.96	64.534	13	71.395	53.814	3	56.28	55.637
24	62.926	33.875	30	58.424	65.821	14	71.395	53.814	4	55.422	53.814
25	62.926	33.768	31	56.923	64.749	15	71.395	53.814	5	56.066	54.029
26	62.819	32.589	32	58.424	65.178	16	71.395	53.814	6	57.138	54.136
27	62.176	33.018	33	56.709	63.57	17	71.288	53.922	7	56.602	53.814
28	60.354	32.374	34	58.531	65.821	18	71.288	53.922	8	55.958	56.173
29	60.354	32.589	35	59.603	66.25	19	71.288	53.922	9	56.709	56.387
30	60.032	32.482	36	58.96	65.285	20	71.288	53.922	10	55.958	54.029
31	61.854	30.338	37	58.853	66.357	21	71.288	53.922	11	57.459	55.208
32	61.318	31.838	38	58.96	65.499	22	71.288	53.922	12	56.28	56.816
33	60.246	30.766	1	57.888	48.026	23	70.752	54.565	13	55.744	56.923
34	59.71	30.659	2	57.888	47.597	24	69.894	53.493	14	56.28	56.816
35	59.282	31.838	3	59.389	48.776	25	68.072	52.206	15	57.566	55.851
36	60.139	31.517	4	57.459	50.277	26	68.072	52.85	16	57.459	55.744
37	59.818	30.981	5	60.032	49.634	27	69.251	52.206	17	57.138	55.315
38	60.675	31.302	6	60.139	48.454	28	69.251	51.992	18	57.03	55.53
1	52.206	41.808	7	51.778	44.274	29	68.501	52.314	19	56.923	56.066
2	53.707	42.558	8	43.952	36.662	30	68.608	52.635	20	57.352	55.422
3	54.029	42.451	9	42.451	37.091	31	68.072	53.064	21	57.566	55.744
4	52.206	44.81	10	36.234	29.909	32	70.216	53.386	22	57.352	55.53
5	54.029	43.416	11	21.654	10.613	33	69.144	52.742	23	57.352	55.315
6	55.315	44.166	12	16.938	8.79	34	69.466	52.85	24	55.53	57.03
7	53.386	46.096	13	15.973	4.395	35	69.573	52.742	25	57.674	55.53
8	56.28	46.31	14	17.152	3.216	36	69.358	53.171	26	57.781	55.53
9	54.672	46.31	15	19.082	3.43	37	68.822	52.421	27	58.102	55.958
10	54.886	45.882	16	18.76	3.109	38	66.893	50.706	28	57.352	55.315
11	55.422	46.096	17	18.224	4.61	1	50.598	59.925	29	57.459	55.422
12	54.779	46.096	18	18.76	4.717	2	48.99	59.067	30	57.781	55.851
13	54.779	45.453	19	19.51	6.754	3	53.922	59.282	31	58.102	55.744
14	53.922	44.381	20	19.832	3.109	4	54.35	56.173	32	57.888	55.637
15	53.278	44.166	21	19.939	3.109	5	54.994	55.744	33	57.459	55.315
16	53.707	44.595	22	20.261	3.109	6	54.029	56.602	34	57.566	55.422
17	54.779	43.523	23	19.939	3.43	7	54.458	56.602	35	55.958	56.923
18	54.243	43.416	24	21.011	4.181	8	53.6	56.602	36	57.674	55.315
19	52.85	43.523	25	18.438	3.216	9	52.85	55.744	37	57.459	55.422
20	52.206	43.738	26	18.438	4.931	10	53.493	55.422	38	57.352	55.422
21	51.134	41.915	27	22.405	5.789	11	53.064	53.922	1	45.024	44.595
22	51.67	41.915	28	21.226	5.038	12	53.493	54.672	2	44.488	46.096
23	53.6	41.486	29	17.366	3.859	13	53.493	53.707	3	45.238	48.776
24	51.563	42.451	30	17.688	4.074	14	50.92	56.066	4	44.274	47.918
25	54.243	41.808	31	17.366	4.717	15	52.85	55.101	5	42.987	49.419
26	54.136	41.915	32	17.366	4.717	16	49.419	56.923	6	43.63	49.634
27	53.493	39.986	33	17.366	4.61	17	50.384	56.28	7	43.738	50.813
28	54.779	40.629	34	17.366	4.61	18	50.277	56.173	8	42.451	54.994
29	52.957	38.806	35	17.259	4.717	19	50.17	56.387	9	41.594	56.923
30	53.493	38.485	36	17.152	4.61	20	49.955	56.28	10	41.058	57.674
31	52.957	40.093	37	17.259	4.502	21	51.134	54.35	11	40.307	58.746
32	57.674	38.163	38	17.152	4.61	22	51.778	55.422	12	38.806	58.746
33	56.173	40.307	1	54.458	53.6	23	49.526	55.851	13	38.592	57.674
34	56.28	39.878	2	49.848	48.776	24	49.419	55.851	14	37.627	54.886
35	54.672	37.842	3	52.421	48.883	25	51.778	56.387	15	38.592	53.493
36	52.206	37.306	4	50.813	48.026	26	51.67	56.387	16	38.056	54.458
37	54.029	38.163	5	51.885	50.277	27	50.384	55.958	17	35.912	55.637
39	51.992	38.806	6	48.562	48.24	28	50.062	56.173	18	36.126	54.243
1	77.613	65.392	7	48.026	49.312	29	49.955	56.173	19	34.733	53.814
2	69.358	67.214	8	46.31	44.702	30	49.848	55.958	20	31.195	54.35
3	60.782	68.286	9	48.562	44.595	31	49.741	56.066	21	28.086	54.136
4	54.994	68.072	10	47.382	47.168	32	49.955	55.851	22	25.621	56.387
5	51.885	68.715	11	53.171	45.238	33	49.419	56.923	23	28.408	55.958
6	52.528	68.501	12	52.421	44.702	34	51.778	54.779	24	30.445	56.066
7	52.421	71.717	13	51.027	45.56	35	49.419	56.494	25	34.947	55.422
8	45.346	85.546	14	51.67	44.381	36	48.883	53.707	26	32.91	58.102
9	19.832	104.306	15	51.027	40.736	37	49.848	55.208	27	35.912	56.494
1	98.088	9.862	16	50.92	39.771	38	49.741	54.994	28	35.59	55.53
2	89.512	17.045	17	53.6	41.379	1	81.901	51.242	29	35.376	57.352
3	81.901	19.725	18	54.672	45.238	2	81.365	52.314	30	33.018	60.354
4	84.152	20.046	19	56.173	45.131	3	81.15	51.778	31	35.162	60.354
5	75.04	14.365	20	55.208	45.238	4	80.722	49.741	32	32.696	63.891
6	63.784	19.832	21	52.206	45.453	5	80.829	49.741	33	30.874	63.248
7	42.773	22.941	22	50.277	45.774	6	80.614	53.064	34	32.374	67.75
8	24.656	22.405	23	55.851	43.309	7	80.614	53.064	35	30.552	65.392
9	17.366	15.544	24	53.814	45.131	8	76.112	53.064	36	29.694	65.285
10	9.755	19.082	25	56.28	45.346	9	75.576	53.6	37	29.909	66.25
11	2.358	20.582	26	54.565	44.81	10	76.219	53.064	38	26.05	65.285
1	53.493	58.102	27	54.886	46.846	11	76.862	52.85	1	63.462	44.917
2	50.92	60.997	28	54.886	47.597	12	77.291	52.85	2	64.106	45.131
3	51.242	61.854	29	56.387	47.918	13	77.72	53.064	3	62.712	45.667
4	50.384	62.926	30	54.779	46.954	14	77.72	52.85	4	62.176	44.595
5	49.634	64.642	31	54.35	46.954	15	79.006	51.134	5	61.64	46.203
6	47.061	64.534	32	52.206	47.061	16	78.47	48.99	6	63.784	44.381
7	45.882	60.354	33	53.493	47.275	17	78.363	50.277	7	63.141	44.274
8	40.093	59.71	34	53.386	46.418	18	78.363	50.384	8	63.891	44.274
9	36.019	58.96	35	53.278	44.81	19	78.363	50.384	9	63.677	44.81
10	30.338	60.461	36	54.136	46.739	20	81.686	49.419	10	63.034	44.917
11	29.266	60.782	37	52.528	46.739	21	80.722	48.99	11	63.784	45.131
12	32.589	57.03	38	52.957	46.525	22	80.614	48.99	12	61.64	45.667
13	36.019	58.424	1	50.277	54.029	23	80.829	48.99	13	62.176	44.381
14	36.234	58.424	2	48.562	58.531	24	81.686	49.419	14	62.926	44.381
15	36.555	54.994	3	48.133	58.638	25	81.794	49.419	15	62.819	45.131
16	32.803	54.565	4	49.955	57.459	26	81.794	49.312	16	62.926	45.131
17	33.339	54.458	5	49.634	55.744	27	81.901	49.419	17	63.891	45.131
18	34.733	56.923	6	52.099	55.208	28	81.901	49.419	18	63.462	45.131
19	37.52	59.818	7	49.205	55.208	29	83.294	50.491	19	62.712	45.56
20	35.59	60.354	8	51.027	54.35	30	82.437	51.027	20	64.642	47.061
21	33.125	59.282	9	50.384	55.315	31	83.294	49.634	21	63.034	45.453
22	34.84	57.888	10	50.17	55.422	32	83.723	49.312	22	64.213	45.238
23	33.446	57.888	11	48.669	55.958	33	83.723	48.133	23	63.462	45.131
24	33.339	62.926	12	48.24	57.674	34	83.616	48.133	24	63.355	45.131
25	31.088	61.962	13	47.704	56.494	35	83.616	48.133	25	63.462	46.525
26	33.339	61.104	14	46.525	57.674	36	83.723	48.133	26	63.462	45.238
27	33.125	61.104	15	46.203	56.387	37	83.616	48.133	27	63.677	45.131
28	30.445	60.354	16	43.845	54.243	1	52.742	59.067	28	63.248	45.774
29	32.16	62.176	17	44.166	53.6	2	51.134	59.603	29	63.891	46.418
30	33.232	61.211	18	43.416	54.243	3	51.027	60.354	30	63.891	46.418
31	30.016	59.067	19	39.235	54.994	4	52.957	58.317	31	64.642	46.096
32	30.552	58.853	20	40.093	58.531	5	53.493	58.317	32	64.856	46.525
33	29.694	59.282	21	39.021	59.818	6	52.742	59.603	33	64.642	46.203
34	28.837	58.96	22	40.307	59.603	7	52.742	60.461	34	63.248	45.989
35	29.051	59.067	23	40.522	59.71	8	51.885	58.317	35	63.462	45.024
36	31.41	61.962	24	39.235	55.958	9	51.778	60.354	36	63.248	45.346
37	31.195	62.39	25	37.734	55.53	10	53.6	58.531	37	65.606	44.702
38	32.16	61.962	26	35.269	54.136	11	53.6	60.461	38	64.856	46.203
1	55.744	58.317	27	33.661	54.136	12	52.421	59.174	1	63.355	57.781
2	37.198	78.899	28	34.626	53.814	13	51.134	59.174	2	64.534	57.138
3	25.085	92.942	29	34.84	56.602	14	52.635	59.282	3	70.538	59.174
4	16.509	102.483	30	36.234	52.099	15	52.528	58.638	4	72.253	60.568
5	10.291	101.947	31	35.162	52.099	16	52.957	59.389	5	77.506	60.89
6	7.182	100.232	32	34.197	52.635	17	53.6	59.818	6	81.15	59.818
7	4.074	91.87	33	33.554	51.778	18	52.206	58.317	7	83.83	59.389
1	63.677	59.174	34	32.16	50.706	19	52.099	59.496	8	88.011	62.712
2	50.598	76.97	35	32.374	52.85	20	52.635	60.461	9	91.87	64.856
3	45.453	91.763	36	33.875	53.922	21	50.277	59.603	10	94.658	64.213
4	51.027	106.771	37	33.982	52.957	22	52.099	58.638	11	93.05	63.462
1	49.955	54.779	38	33.232	52.314	23	51.778	59.925	12	94.122	62.712
2	26.157	80.507	1	54.779	66.464	24	51.563	60.246	13	94.122	62.39
3	12.006	105.056	2	53.493	64.32	25	52.421	59.925	14	94.014	63.141
1	61.64	45.238	3	48.026	58.424	26	50.706	60.461	15	96.266	63.57
2	61.533	49.741	4	42.88	60.675	27	50.491	58.638	16	94.872	63.034
3	62.069	55.744	5	37.734	61.318	28	49.741	60.461	17	95.622	63.355
4	64.32	71.717	6	34.84	63.677	29	50.813	60.461	18	93.586	63.034
5	62.605	88.762	7	32.696	65.606	30	51.885	59.496	19	94.872	64.106
6	64.106	90.155	8	33.018	66.357	31	52.206	59.389	20	93.157	62.283
7	65.606	91.013	9	28.944	65.928	32	52.206	59.174	21	93.693	62.926
8	68.822	96.266	10	25.942	68.608	33	52.206	60.032	22	93.371	61.533
9	67.107	96.694	11	21.226	70.538	34	52.099	59.496	23	94.979	61.533
10	67.322	93.264	12	17.474	72.467	35	52.206	59.496	24	94.122	61.533
11	66.357	92.406	13	15.758	75.362	36	51.456	58.317	25	93.693	61.533
12	66.571	98.946	14	14.901	76.434	37	51.134	58.746	26	93.586	61.533
13	66.464	99.053	15	13.936	77.398	38	51.456	58.746	27	93.907	61.747
14	66.571	97.766	16	15.437	79.114	1	53.278	45.238	28	93.907	62.283
15	62.39	99.696	17	16.616	78.578	2	51.242	43.094	29	93.907	62.498
16	64.534	101.09	18	16.187	76.541	3	52.206	43.738	30	93.907	62.498
17	71.61	102.162	19	15.758	78.042	4	53.278	42.88	31	93.8	62.498
18	72.36	101.947	20	16.616	77.184	5	56.28	40.95	32	93.693	62.39
19	71.502	99.803	21	16.402	77.077	6	60.139	39.235	33	93.907	62.176
20	72.467	98.088	22	16.616	76.648	7	63.462	40.414	34	93.478	62.069
21	72.682	96.587	23	16.08	74.933	8	64.213	40.736	35	93.371	62.176
22	70.645	94.336	24	15.651	74.826	9	63.677	39.771	1	49.634	66.678
23	72.253	91.763	25	15.866	76.005	10	73.861	38.592	2	51.027	66.464
24	72.146	92.192	26	13.078	81.043	11	79.328	38.485	3	54.136	65.714
25	71.824	91.442	27	9.005	85.438	12	83.509	37.198	4	55.208	64.106
26	71.931	91.763	28	8.254	88.547	13	83.294	33.661	5	56.494	63.355
27	76.005	92.085	29	5.253	94.443	14	84.581	33.339	6	56.816	63.034
28	76.326	95.837	30	4.181	98.731	15	85.01	28.515	7	56.816	60.354
29	75.362	95.837	31	6.646	95.086	16	87.582	23.155	8	57.245	58.424
30	73.325	99.91	32	7.075	94.122	17	89.941	20.69	9	58.102	57.245
31	75.898	100.554	33	9.97	92.085	18	97.338	19.189	10	58.102	55.637
32	75.147	103.984	34	12.221	91.442	19	98.302	16.83	11	58.638	55.637
33	72.789	101.197	35	15.115	90.262	20	98.838	17.474	12	58.531	54.672
34	72.038	102.162	36	17.581	91.87	21	86.725	17.045	13	58.531	54.029
35	69.358	102.269	37	20.797	90.048	22	89.19	19.51	14	61.426	52.957
36	63.034	105.056	38	24.013	90.477	23	85.653	22.298	15	61.64	51.134
37	66.893	106.342	1	83.83	54.886	24	86.725	22.083	16	60.461	52.528
38	66.893	106.021	2	83.509	56.816	25	88.654	19.082	17	60.997	51.027
1	103.448	32.589	3	83.187	56.602	26	89.512	23.155	18	60.89	52.528
2	95.944	35.912	4	81.043	56.816	27	90.584	25.728	19	61.211	48.776
3	87.368	39.878	5	82.437	56.494	28	90.584	22.941	20	61.318	48.99
1	60.461	55.208	6	83.187	57.03	29	96.48	20.69	21	61.426	48.99
2	59.71	55.637	7	83.402	54.243	30	97.552	18.653	22	59.603	52.421
3	64.534	63.677	8	85.331	56.709	31	94.658	19.618	23	59.71	49.634
4	72.896	74.611	9	86.082	57.03	32	87.797	17.688	24	60.782	52.421
5	81.365	80.936	10	86.725	55.101	33	89.726	20.046	25	61.211	52.957
6	88.976	87.904	11	86.51	54.136	34	91.549	19.725	26	61.962	51.67
7	95.944	95.73	12	85.76	56.173	35	90.262	20.69	27	59.925	50.598
8	97.445	100.982	13	83.938	56.066	36	90.906	21.547	28	60.032	52.742
9	105.485	106.128	14	83.938	56.173	37	89.834	19.832	29	59.389	52.206
1	66.678	4.502	15	84.152	56.387	38	90.155	21.118	30	60.89	52.635
2	71.931	14.15	16	84.581	54.994	1	50.706	59.174	31	60.89	52.635
3	71.824	22.19	17	84.045	55.315	2	47.382	59.603	32	60.354	52.957
4	72.146	32.374	18	86.082	53.493	3	47.382	58.746	33	61.426	51.885
5	73.539	45.346	19	85.331	53.814	4	49.312	55.101	34	61.211	53.171
6	74.718	48.669	20	84.902	53.386	5	56.387	48.24	35	59.496	53.171
7	74.611	60.246	21	83.187	52.957	6	53.386	44.166	36	60.246	53.064
1	74.075	44.595	22	82.651	54.565	7	54.458	50.384	37	60.997	52.85
2	72.896	44.166	23	82.758	53.064	8	54.029	52.206	38	61.426	52.742
3	67.214	46.632	24	82.544	54.458	9	52.314	57.245	1	41.594	55.851
4	63.784	49.848	25	84.366	53.922	10	53.493	60.139	2	42.666	57.888
5	64.106	49.526	26	84.795	53.493	11	52.421	59.282	3	43.416	56.602
6	61.426	47.811	27	85.331	54.029	12	52.635	58.424	4	46.954	57.138
7	60.675	47.597	28	88.869	53.171	13	52.742	60.139	5	46.525	57.995
8	62.176	47.49	29	88.869	53.171	14	49.526	59.71	6	48.776	59.174
9	57.674	48.669	30	88.333	54.779	15	51.242	59.71	7	48.99	58.96
10	55.208	51.992	31	86.51	54.136	16	52.314	58.102	8	50.384	59.389
11	55.851	52.85	32	90.262	58.96	17	50.062	58.102	9	48.24	56.923
12	59.389	55.101	33	89.298	56.816	18	52.206	59.282	10	50.706	59.389
13	57.352	57.888	34	90.155	58.102	19	50.384	60.032	11	50.706	57.245
14	57.781	56.816	35	85.867	54.886	20	49.848	58.21	12	50.062	57.138
15	54.886	55.53	36	82.008	55.744	21	49.741	57.03	13	49.205	58.853
16	53.278	58.531	37	81.15	57.995	22	51.563	57.781	14	49.312	56.923
17	53.6	57.03	38	77.72	58.96	23	51.134	58.638	15	50.062	58.102
18	54.779	58.424	1	61.64	56.387	24	51.456	56.923	16	50.384	58.638
19	57.245	54.458	2	58.317	55.637	25	51.563	58.96	17	50.277	57.888
20	58.424	54.779	3	55.208	54.779	26	51.242	59.174	18	49.526	57.459
21	62.819	52.421	4	55.53	53.278	27	50.598	56.816	19	47.704	59.496
22	61.747	51.456	5	54.886	55.744	28	49.205	57.245	20	49.955	58.317
23	58.317	51.242	6	54.458	54.672	29	51.563	57.995	21	49.955	57.566
24	58.21	51.242	7	55.315	55.851	30	50.92	57.674	22	50.598	58.102
25	56.494	54.029	8	51.992	54.565	31	51.242	56.28	23	51.67	58.21
26	57.459	53.707	9	50.17	54.672	32	51.456	58.424	24	51.563	57.888
27	60.675	55.422	10	50.17	53.6	33	51.242	58.317	25	50.706	57.459
28	60.782	56.173	11	50.813	48.24	34	50.17	56.173	26	51.885	57.995
29	60.461	56.387	12	53.064	47.918	35	50.706	57.352	27	57.352	59.496
30	60.354	56.494	13	52.421	48.99	36	51.67	56.602	28	67.536	61.104
31	60.568	58.102	14	54.886	50.277	37	52.314	59.603	29	73.539	64.213
32	60.568	58.317	15	54.886	48.883	38	53.171	59.925	30	81.901	65.178
33	60.246	58.102	16	53.922	48.454	1	70.538	52.206	31	89.083	64.963
34	59.71	57.781	17	53.814	49.419	2	71.181	52.421	32	92.299	65.928
35	60.89	59.067	18	53.171	50.384	3	70.645	51.992	33	92.728	65.07
36	56.709	54.029	19	53.814	47.811	4	69.894	51.242	34	92.621	66.035
37	56.602	54.029	20	51.992	47.168	5	68.179	51.027	35	91.013	67
1	32.482	75.79	21	51.67	49.741	6	65.606	37.627	36	87.904	65.928
2	29.266	76.97	22	53.493	47.704	7	68.072	28.194	37	88.654	66.464
3	33.661	77.077	23	53.814	48.883	8	65.07	23.37	38	88.011	66.142
4	30.874	79.328	24	51.992	49.312	9	61.533	24.763	1	46.739	65.392
5	33.018	79.328	25	53.493	49.741	10	65.606	16.294	2	47.275	64.106
6	30.659	79.114	26	53.922	49.098	11	70.966	21.011	3	46.846	64.213
7	33.018	82.008	27	53.171	50.17	12	72.896	24.763	4	47.275	63.998
8	33.875	81.794	28	56.494	49.205	13	78.685	24.763	5	48.562	64.749
9	33.875	80.186	29	57.245	48.669	14	78.149	26.157	6	47.811	64.106
10	33.554	82.33	30	56.923	47.382	15	99.91	24.978	7	48.026	65.392
11	36.448	83.938	31	55.744	48.776	16	104.734	3.216	8	47.704	65.392
12	36.984	85.01	32	54.35	50.277	1	57.352	52.314	9	47.704	64.534
13	40.629	87.797	33	53.707	48.133	2	56.602	53.278	10	47.811	64.749
14	40.414	89.083	34	54.136	47.918	3	50.17	54.994	11	47.704	63.998
15	42.666	91.87	35	56.066	48.562	4	41.594	59.818	12	43.63	63.034
16	40.414	91.549	36	55.958	48.562	5	38.699	62.605	13	42.13	62.39
17	41.058	95.837	37	55.744	49.205	6	40.522	63.248	14	42.022	62.926
18	39.664	93.907	38	56.602	48.24	7	41.058	65.606	15	42.773	62.069
19	43.738	96.266	1	57.674	33.768	8	40.307	64.213	16	41.701	62.605
20	43.094	98.088	2	56.602	33.018	9	40.736	64.963	17	42.022	62.069
21	44.917	99.91	3	57.888	32.91	10	41.379	63.998	18	40.093	61.318
22	47.168	101.626	4	56.602	29.802	11	40.2	66.893	19	40.736	63.355
23	48.24	105.27	5	56.494	31.624	12	41.486	66.786	20	41.594	63.57
24	46.846	104.091	6	57.352	28.837	13	39.878	66.893	21	42.666	62.819
25	45.024	106.45	7	56.923	29.694	14	39.45	67	22	40.95	61.962
26	43.202	106.45	8	58.424	28.622	15	38.163	68.394	23	39.342	61.533
27	43.416	106.45	9	58.96	26.478	16	36.877	64.963	24	39.021	61.533
1	41.272	50.277	10	58.96	26.264	17	36.234	64.856	25	39.45	61.962
2	34.84	64.963	11	58.531	24.656	18	36.234	64.856	26	39.557	62.39
3	32.589	93.693	12	59.389	24.549	19	33.768	65.821	27	39.021	60.032
4	28.408	105.485	13	59.174	23.262	20	34.518	66.678	28	38.914	59.925
1	63.355	49.634	14	58.531	25.406	21	34.733	67.536	29	39.128	60.032
2	68.286	49.634	15	58.531	25.728	22	34.197	68.501	30	40.093	59.925
3	69.787	49.955	16	57.781	25.406	23	33.875	70.109	31	38.27	60.568
4	69.68	53.171	17	59.818	24.442	24	34.304	70.966	32	39.128	60.354
5	70.752	53.064	18	59.71	25.514	25	32.589	70.645	33	40.307	58.96
6	67.643	52.742	19	58.853	24.442	26	33.125	69.144	34	39.771	58.96
7	66.893	53.278	20	58.638	23.691	27	32.803	66.786	35	38.378	59.174
8	63.784	52.528	21	57.888	24.87	28	34.518	66.678	36	38.378	59.282
9	64.642	57.459	22	60.461	23.798	29	30.981	67.75	37	38.27	59.174
10	69.251	57.566	23	60.246	23.691	30	30.766	67.643	38	40.522	58.96
11	67.429	56.494	24	58.21	22.619	31	29.909	68.394	1	58.317	57.781
12	70.109	56.709	25	59.603	24.227	32	28.515	66.464	2	58.102	58.21
13	70.859	56.602	26	59.496	23.262	33	28.301	66.786	3	56.173	56.709
14	70.323	60.568	27	56.709	24.978	34	30.338	65.178	4	58.317	57.566
15	72.467	60.461	28	57.781	24.334	35	25.621	66.357	5	58.746	57.781
16	74.29	57.674	29	57.781	24.334	36	24.334	67.107	6	57.245	57.245
17	79.757	58.531	30	53.814	24.87	37	25.085	68.179	7	57.995	57.245
18	82.115	58.317	31	54.886	24.87	38	25.406	67.965	8	58.638	57.138
19	86.618	58.96	32	56.28	24.656	1	67	66.142	9	60.032	58.102
20	91.334	63.141	33	55.208	22.512	2	66.893	64.749	10	58.531	57.459
21	87.69	61.64	34	56.602	22.726	3	64.213	66.357	11	60.139	57.674
22	82.33	63.677	35	56.173	23.477	4	65.714	66.25	12	60.139	58.531
23	81.472	60.997	36	56.387	23.584	5	65.821	65.392	13	60.461	59.282
24	81.901	61.962	37	54.886	23.584	6	68.072	65.178	14	61.533	56.173
25	82.115	65.178	38	56.173	21.654	7	69.144	66.893	15	60.675	57.995
26	82.758	66.357	1	52.957	66.893	8	67.429	64.642	16	60.461	57.352
27	84.259	67.536	2	51.67	67.429	9	68.93	64.106	17	60.139	58.317
28	83.294	61.533	3	54.243	69.144	10	67.858	64.106	18	61.211	59.818
29	81.686	53.493	4	52.314	68.608	11	68.93	64.642	19	60.139	57.995
30	76.97	52.85	5	55.315	67	12	68.286	65.285	20	59.282	58.424
31	78.899	48.669	6	55.208	66.786	13	68.93	63.462	21	59.71	57.888
32	77.077	45.882	7	56.816	65.392	14	69.466	64.32	22	60.246	57.674
33	79.971	46.418	8	56.28	63.248	15	68.179	65.928	23	61.426	57.888
34	78.363	45.024	9	56.066	63.57	16	68.93	66.25	24	60.032	57.352
35	82.222	40.093	10	60.246	63.891	17	71.181	67.107	25	61.533	58.21
36	83.294	32.803	11	61.747	64.963	18	69.573	65.285	26	60.782	59.496
37	87.046	28.944	12	63.248	64.32	19	69.358	65.07	27	61.211	60.461
38	89.298	25.514	13	62.819	66.25	20	69.358	64.749	28	60.89	59.818
1	59.496	60.139	14	64.213	67.75	21	71.074	64.856	29	61.426	58.424
2	55.208	60.354	15	60.997	65.392	22	70.002	65.285	30	60.354	58.21
3	49.419	62.605	16	61.747	67.429	23	71.181	64.106	31	61.426	58.317
4	47.275	64.106	17	61.426	65.714	24	70.859	65.606	32	61.318	58.424
5	48.347	64.32	18	60.461	68.608	25	69.358	63.248	33	59.925	59.067
6	49.205	69.787	19	60.032	68.179	26	70.859	64.534	34	60.89	60.139
7	49.312	70.966	20	57.352	68.501	27	70.645	64.963	35	60.997	60.139
8	52.099	67	21	57.995	69.573	28	70.859	65.714	36	59.71	58.531
9	50.384	64.963	22	57.352	68.286	29	69.358	63.891	37	60.461	58.853
10	47.811	62.819	23	60.461	68.715	30	68.501	63.891	38	61.211	59.603
11	51.027	65.606	24	59.389	67.858	31	69.894	66.142	1	40.307	23.691
12	51.456	61.747	25	62.605	69.894	32	69.466	65.606	2	40.629	23.798
13	52.314	64.106	26	61.318	70.966	33	67.536	65.714	3	40.093	24.549
14	50.17	63.248	27	59.389	69.144	34	70.752	63.355	4	40.522	24.87
15	48.883	63.784	28	59.496	70.216	35	69.573	63.998	5	40.629	24.763
16	52.635	62.605	29	58.96	69.894	36	70.645	64.32	6	40.736	26.8
17	53.814	65.178	30	59.174	70.109	37	69.787	65.928	7	42.237	27.122
18	53.707	64.856	31	58.102	67.965	38	69.787	66.035	8	41.486	27.979
19	53.814	63.355	32	58.96	69.037	1	67.322	66.035	9	40.95	25.621
20	54.458	60.354	33	58.317	67.214	2	65.714	63.355	10	43.309	26.371
21	54.886	57.245	34	59.71	67.214	3	65.178	59.925	11	41.594	25.621
22	55.958	56.602	35	56.494	67.858	4	65.178	57.674	12	41.379	24.87
23	55.208	60.461	36	57.566	65.821	5	62.069	56.923	13	41.486	25.621
24	54.565	60.032	37	56.173	64.427	6	62.069	56.173	14	41.701	25.406
25	57.245	57.888	38	57.566	65.928	7	65.499	56.923	15	42.987	24.013
26	55.101	57.995	1	82.008	55.208	8	65.178	59.603	16	42.987	23.584
27	54.565	58.424	2	78.792	51.778	9	67.107	63.355	17	41.272	22.512
28	54.672	60.032	3	71.931	51.778	10	69.466	63.141	18	41.165	24.227
29	52.957	60.032	4	66.464	47.275	11	72.36	63.784	19	40.2	23.584
30	52.206	60.354	5	61.962	43.738	12	70.216	63.998	20	37.52	23.584
31	48.99	60.032	6	59.389	41.594	13	71.181	65.285	21	39.664	22.941
32	48.454	60.568	7	53.6	40.629	14	72.146	64.534	22	38.699	23.048
33	49.526	58.531	8	52.099	35.162	15	72.896	62.712	23	37.627	22.298
34	51.563	58.21	9	50.813	32.803	16	72.682	62.712	24	37.949	20.69
35	51.027	55.53	10	46.632	29.266	17	71.502	62.926	25	36.341	21.976
36	52.742	60.89	11	41.594	26.264	18	72.253	63.355	26	36.877	22.405
37	51.778	63.891	12	37.52	24.013	19	72.896	62.176	27	36.662	22.298
38	51.885	62.39	13	36.662	22.405	20	71.502	63.248	28	37.52	23.584
1	42.773	49.955	14	34.84	17.581	21	70.216	61.854	29	36.341	23.048
2	54.136	57.674	15	34.411	17.045	22	70.002	61.962	30	37.627	21.118
3	62.712	65.07	16	31.946	15.437	23	65.714	62.176	31	37.198	22.298
4	74.182	69.573	17	14.686	4.931	24	61.318	62.069	32	37.413	21.333
5	78.47	71.931	1	56.28	50.277	25	59.818	59.925	33	38.592	21.654
6	85.974	73.968	2	56.28	51.349	26	56.709	59.067	34	36.019	21.547
7	89.298	78.685	3	58.531	52.206	27	56.173	55.851	35	38.378	22.298
8	95.194	78.685	4	58.853	49.741	28	53.171	55.744	36	36.341	22.298
9	98.302	83.509	5	58.102	49.312	29	56.494	59.282	37	38.592	22.512
10	105.914	85.331	6	58.102	49.741	30	58.746	58.853	38	37.842	21.333
11	106.771	86.939	7	56.816	47.811	31	57.566	57.566	1	60.997	49.955
12	106.128	88.762	8	57.352	49.634	32	58.21	56.387	2	60.997	51.885
13	105.485	86.296	9	59.067	49.526	33	59.389	57.674	3	60.997	51.67
14	103.234	86.189	10	59.389	47.704	34	62.498	56.709	4	60.032	51.349
15	92.942	81.472	11	57.03	47.49	35	63.891	55.208	5	60.997	52.528
16	90.262	79.328	12	58.638	46.846	36	63.891	53.707	6	60.139	52.421
17	86.082	78.042	13	57.674	46.846	37	63.248	49.634	7	59.603	50.598
18	86.832	75.79	14	58.96	48.669	1	60.782	37.52	8	60.675	52.314
19	84.045	76.862	15	57.995	45.882	2	61.747	36.984	9	59.818	50.384
20	85.224	75.469	16	55.53	47.704	3	63.677	38.27	10	59.067	50.277
21	77.077	74.397	17	57.138	47.168	4	62.926	36.984	11	58.853	49.955
22	68.286	70.645	18	55.53	47.168	5	65.392	36.662	12	60.675	50.277
23	65.392	70.538	19	57.352	45.989	6	63.462	35.912	13	60.246	50.598
24	64.963	67.858	20	58.317	46.31	7	63.248	35.376	14	60.461	52.206
25	61.64	69.037	21	58.21	46.31	8	62.712	35.054	15	59.067	50.491
26	56.602	69.466	22	57.888	47.168	9	63.677	35.912	16	60.568	49.955
27	51.992	73.861	23	58.853	46.632	10	61.104	36.555	17	60.461	49.955
28	44.81	79.328	24	57.674	46.096	11	63.248	35.162	18	60.354	50.17
29	36.662	83.402	25	56.066	46.632	12	64.106	36.984	19	60.782	50.062
30	35.162	90.37	26	55.744	45.667	13	63.891	35.376	20	61.104	49.955
31	31.624	100.982	27	56.066	45.56	14	64.534	34.518	21	61.211	50.062
32	26.8	106.128	28	57.888	45.774	15	64.963	34.09	22	61.104	50.17
33	20.904	107.843	29	57.995	45.667	16	64.32	34.09	23	60.782	50.17
1	55.315	56.173	30	56.066	45.346	17	62.819	35.698	24	61.211	50.813
2	67.107	67.536	31	55.422	46.096	18	63.034	34.626	25	60.89	50.706
3	80.722	79.971	32	57.566	46.31	19	62.819	34.84	26	61.104	50.491
4	100.661	97.016	33	57.138	45.238	20	62.712	34.09	27	58.853	50.813
5	106.342	106.342	34	56.066	44.81	21	61.211	35.054	28	58.96	50.491
1	50.384	68.822	35	55.637	46.846	22	61.211	34.304	29	60.246	50.17
2	49.634	67.858	36	56.494	44.702	23	64.32	33.875	30	58.853	51.885
3	51.778	71.288	37	56.709	43.738	24	63.891	33.661	31	60.354	51.563
4	53.386	72.467	38	55.744	44.81	25	63.784	33.446	32	59.818	50.598
5	55.208	72.36	1	55.101	81.15	26	63.57	33.446	33	61.104	51.349
6	54.35	72.574	2	54.35	82.33				34	59.818	51.67
7	54.458	71.395	3	54.243	79.757				35	60.246	50.813
8	56.28	70.966	4	55.208	79.971				36	59.71	50.062
9	59.282	66.464	5	54.672	79.542				37	60.032	50.384
10	63.891	65.821	6	53.171	80.829				38	60.675	51.456
11	63.141	67.322	7	53.814	81.043				1	68.179	65.178
12	60.997	68.394	8	54.136	81.043				2	67.75	66.035
13	60.997	68.179	9	55.315	81.258				3	65.821	65.821
14	63.462	68.501	10	52.742	84.259				4	64.749	64.427
15	61.747	66.571	11	56.28	81.686				5	66.25	64.534
16	62.498	69.037	12	54.35	82.437				6	65.928	67.322
17	61.211	68.822	13	54.029	83.187				7	66.25	68.822
18	57.03	71.288	14	55.53	82.651				8	64.534	69.251
19	52.742	73.861	15	54.565	80.614				9	63.784	69.037
20	55.315	75.683	16	54.029	81.579				10	64.642	68.93
21	55.422	77.398	17	55.851	82.866				11	62.712	66.893
22	56.066	81.043	18	54.565	81.901				12	63.248	67.75
23	55.101	81.472	19	54.35	82.115				13	64.642	67.107
24	57.352	79.757	20	53.707	81.365				14	64.642	66.035
25	58.102	83.294	21	54.994	82.008				15	62.39	62.498
26	58.21	79.971	22	54.886	82.544				16	62.283	61.533
27	56.602	76.434	23	53.922	82.115				17	64.106	63.891
28	58.96	74.826	24	54.243	81.15				18	62.283	55.958
29	55.851	75.683	25	53.922	81.579				19	60.782	51.027
30	54.136	72.896	26	52.85	82.651				20	61.854	47.061
31	52.206	73.754	27	51.885	82.222				21	62.176	44.488
32	49.205	72.896	28	52.957	81.579				22	60.246	43.63
33	47.597	74.611	29	51.885	83.187				23	61.426	41.594
34	48.026	75.04	30	52.421	82.544				24	62.926	39.45
35	45.774	70.43	31	52.314	80.722				25	67.75	42.88
36	42.666	72.253	32	52.742	82.544				26	71.288	43.63
37	43.738	72.36	33	51.563	80.614				27	72.789	43.416
38	45.882	70.752	34	50.92	81.258				28	71.824	41.808
			35	50.598	80.293				29	72.896	39.45
			36	50.92	80.078				30	71.181	39.235
			37	50.92	80.186				31	69.894	41.165
			38	51.456	80.507				32	73.539	43.416
			1	74.504	60.782				33	76.005	44.488
			2	37.842	54.35				34	75.683	46.31
			3	27.336	46.739				35	76.862	47.275
			4	24.442	41.272				36	76.648	48.562
			5	24.442	43.202				37	78.149	49.741
			6	25.299	44.166				38	78.685	47.49
			7	24.87	49.098				1	50.813	39.771
			8	24.12	56.816				2	51.992	41.486
			9	22.726	63.462				3	53.386	42.022
			10	21.333	70.752				4	54.243	43.845
			11	21.011	74.826				5	55.315	48.454
			12	20.475	74.933				6	57.03	46.954
			13	20.154	75.147				7	58.317	48.454
			14	19.832	75.362				8	60.139	45.667
			15	19.939	75.04				9	57.888	46.525
			16	20.368	75.362				10	59.389	45.453
			17	20.261	75.04				11	61.104	46.418
			18	20.797	78.363				12	58.531	46.954
			19	20.475	78.685				13	60.139	48.026
			20	21.011	79.221				14	57.995	48.026
			21	22.512	79.864				15	59.496	45.882
			22	21.547	78.149				16	56.602	48.454
			23	23.37	79.114				17	57.459	46.31
			24	22.083	78.578				18	57.674	46.525
			25	21.869	78.363				19	57.245	45.882
			26	20.797	78.149				20	58.424	45.882
			27	21.654	79.006				21	57.352	46.31
									22	57.245	46.096
									23	56.387	47.918
									24	57.245	46.096
									25	57.138	46.096
									26	55.958	47.275
									27	55.744	47.275
									28	55.744	47.811
									29	55.851	47.811
									30	55.744	47.918
									31	56.28	48.026
									32	55.851	48.24
									33	55.744	48.133
									34	55.958	48.347
									35	55.744	48.454
									36	58.638	48.24
									37	58.638	48.24
									38	58.531	48.24
									1	55.315	61.533
									2	53.386	59.496
									3	53.922	59.603
									4	51.992	60.997
									5	52.85	62.498
									6	51.242	61.747
									7	51.456	63.141
									8	50.813	63.57
									9	51.027	62.39
									10	49.848	62.926
									11	49.205	64.427
									12	49.634	63.141
									13	48.99	62.605
									14	47.704	63.141
									15	49.312	60.568
									16	48.776	60.782
									17	49.205	62.498
									18	49.419	61.962
									19	47.811	63.034
									20	47.811	62.605
									21	49.741	60.675
									22	48.347	62.39
									23	48.026	62.39
									24	48.026	61.962
									25	47.597	61.211
									26	47.382	60.461
									27	47.275	60.246
									28	46.954	59.067
									29	49.634	59.174
									30	50.062	57.245
									31	49.955	57.674
									32	50.598	59.067
									33	48.99	60.782
									34	51.134	60.246
									35	50.92	61.747
									36	47.168	59.496
									37	46.954	59.174
									38	46.418	60.461
									1	53.707	56.494
									2	54.779	56.28
									3	53.6	56.066
									4	51.67	56.602
									5	54.029	54.243
									6	52.635	53.064
									7	50.598	53.064
									8	52.099	54.672
									9	51.885	54.458
									10	50.062	55.851
									11	50.598	54.994
									12	50.277	56.066
									13	51.778	55.101
									14	51.885	56.709
									15	51.778	56.923
									16	53.278	56.923
									17	49.955	56.709
									18	51.134	56.387
									19	49.634	56.28
									20	49.098	56.387
									21	50.384	56.494
									22	49.848	54.994
									23	48.99	55.101
									24	49.848	54.458
									25	50.17	54.029
									26	48.347	54.35
									27	47.382	55.851
									28	47.918	56.816
									29	46.954	57.674
									30	47.168	58.746
									31	46.954	58.746
									32	49.098	56.173
									33	49.098	56.28
									34	50.813	56.173
									35	50.92	56.28
									36	51.134	59.818
									37	49.634	59.603
									1	57.245	70.752
									2	57.781	70.752
									3	57.352	70.752
									4	55.53	72.467
									5	55.744	71.824
									6	53.814	70.002
									7	50.062	72.682
									8	34.518	72.574
									9	22.083	72.574
									10	18.867	74.504
									11	19.939	73.968
									1	55.315	54.672
									2	54.243	54.029
									3	54.994	53.707
									4	54.994	53.707
									5	54.029	54.458
									6	54.458	55.958
									7	53.171	54.779
									8	54.779	56.28
									9	52.635	54.565
									10	52.206	55.208
									11	53.171	54.029
									12	51.885	54.35
									13	51.134	52.957
									14	53.278	52.099
									15	51.027	54.029
									16	53.493	51.885
									17	54.029	53.814
									18	54.029	53.707
									19	53.922	53.707
									20	52.528	51.992
									21	53.814	53.493
									22	54.35	54.029
									23	54.35	53.814
									24	53.493	53.171
									25	54.136	53.6
									26	53.171	53.064
									27	53.6	53.493
									28	53.922	53.493
									29	52.957	52.742
									30	54.136	52.635
									31	54.35	53.493
									32	51.885	54.886
									33	51.885	54.672
									34	51.885	54.779
									35	54.136	54.243
									36	54.136	54.029
									37	54.243	54.136
									1	53.386	69.68
									2	52.099	69.787
									3	54.672	68.608
									4	53.386	67.75
									5	56.602	67.536
									6	54.672	68.179
									7	55.637	64.856
									8	55.744	66.142
									9	55.637	65.821
									10	53.814	65.714
									11	54.243	66.035
									12	53.6	65.285
									13	55.851	65.392
									14	55.958	65.499
									15	55.958	65.499
									16	55.422	65.285
									17	55.53	65.285
									18	55.637	65.178
									19	55.637	65.178
									20	57.888	63.141
									21	54.779	64.534
									22	54.672	64.642
									23	54.243	64.642
									24	53.814	64.749
									25	53.171	64.963
									26	53.6	65.07
									27	51.67	66.142
									28	51.885	65.714
									29	53.064	67.965
									30	53.814	67.643
									31	53.064	68.286
									32	55.744	67.75
									33	55.101	65.285
									34	54.994	63.034
									35	54.886	63.034
									36	54.994	65.178
									37	54.886	65.178
									38	54.35	65.285
									1	43.523	63.248
									2	47.168	57.995
									3	50.813	56.602
									4	51.027	55.101
									5	53.386	55.744
									6	54.243	51.67
									7	59.389	48.669
									8	62.819	46.632
									9	64.856	42.558
									10	64.642	42.558
									11	65.714	46.846
									12	66.786	43.309
									13	68.501	42.987
									14	69.894	44.488
									1	50.17	51.67
									2	54.243	50.92
									3	55.53	50.384
									4	57.459	53.386
									5	53.922	54.886
									6	54.243	54.458
									7	55.101	51.349
									8	55.637	51.563
									9	56.816	52.421
									10	57.888	51.242
									11	60.675	50.384
									12	58.317	50.277
									13	60.675	51.027
									14	61.533	52.099
									15	63.462	49.955
									16	64.534	50.17
									17	65.606	50.17
									18	66.786	50.491
									19	67.214	51.349
									20	70.43	51.778
									21	72.038	50.813
									22	73.539	50.92
									23	74.504	51.885
									24	77.398	50.92
									25	76.97	49.848
									26	78.363	49.312
									27	82.33	48.776
									28	82.651	49.098
									29	83.294	48.454
									30	86.725	47.704
									31	90.155	45.882
									32	92.514	44.595
									33	93.371	44.059
									34	97.23	42.666
									35	102.912	41.165
									36	106.664	41.701
									1	53.814	52.742
									2	53.922	52.85
									3	54.029	52.528
									4	53.278	53.922
									5	54.243	52.206
									6	54.136	52.314
									7	55.637	50.92
									8	55.744	50.92
									9	55.637	50.706
									10	55.422	52.957
									11	53.493	53.386
									12	53.493	53.386
									13	53.493	53.064
									14	53.6	53.386
									15	54.672	51.563
									16	56.923	52.206
									17	56.923	52.528
									18	55.637	52.957
									19	55.208	53.493
									20	55.208	53.493
									21	54.458	53.814
									22	54.565	53.814
									23	56.602	52.314
									24	55.208	52.957
									25	54.994	53.064
									26	55.101	51.027
									27	54.886	51.027
									28	54.243	53.386
									29	52.206	53.814
									30	51.885	54.029
									31	51.563	53.064
									32	52.85	52.635
									33	52.742	52.314
									34	53.171	51.027
									35	53.493	53.6
									1	75.254	58.746
									2	75.362	58.424
									3	76.434	56.173
									4	77.398	55.422
									5	77.077	55.744
									6	78.256	54.672
									7	75.683	54.672
									8	75.79	57.566
									9	75.79	57.459
									10	75.576	57.245
									11	74.933	57.566
									12	75.254	57.352
									13	76.219	57.03
									14	75.576	55.53
									15	77.291	55.422
									16	76.862	56.923
									17	78.685	57.674
									18	78.042	57.674
									19	77.184	57.03
									20	75.469	54.994
									21	77.613	55.53
									22	76.648	54.994
									23	74.397	55.744
									24	75.254	56.602
									25	76.326	54.779
									26	76.219	54.779
									27	74.397	57.674
									28	72.574	57.138
									29	72.36	57.781
									30	70.966	55.315
									31	70.323	56.709
									32	72.789	55.851
									33	73.003	57.138
									34	74.826	55.315
									35	72.682	57.245
									36	72.682	57.566
									37	72.682	57.459
									1	63.141	45.882
									2	63.141	45.774
									3	62.069	45.131
									4	65.928	44.81
									5	65.499	43.416
									6	65.821	43.523
									7	65.07	43.952
									8	64.856	43.952
									9	64.856	43.952
									10	64.856	43.952
									11	65.07	43.952
									12	64.963	43.952
									13	65.07	43.952
									14	64.963	43.952
									15	65.178	43.952
									16	64.856	43.952
									17	65.285	43.952
									18	65.285	43.952
									19	65.178	43.952
									20	65.178	43.952
									21	65.07	43.952
									22	65.07	43.952
									23	64.749	43.952
									24	64.642	43.952
									25	64.213	43.952
									26	64.106	43.952
									27	64.106	43.738
									28	63.784	43.952
									29	63.57	43.952
									30	63.891	43.309
									31	61.747	42.773
									32	63.891	42.237
									33	64.106	42.451
									34	64.106	42.773
									35	63.677	40.843
									36	63.677	41.486
									37	63.462	43.309
									38	63.141	43.202
									1	85.224	55.637
									2	85.438	55.53
									3	85.438	56.066
									4	85.224	56.173
									5	85.01	55.958
									6	82.222	57.03
									7	83.83	57.781
									8	84.045	56.387
									9	83.294	56.066
									10	83.938	57.674
									11	85.331	55.315
									12	85.331	55.315
									13	85.867	54.672
									14	85.974	54.672
									15	85.546	55.101
									16	85.974	54.672
									17	85.974	54.672
									18	85.974	54.672
									19	85.974	54.672
									20	85.974	54.672
									21	85.867	54.565
									22	85.653	55.101
									23	85.76	54.672
									24	85.224	55.208
									25	84.795	55.422
									26	84.474	55.53
									27	84.581	55.53
									28	84.688	55.101
									29	84.366	55.744
									30	84.259	55.744
									31	84.152	55.851
									32	83.509	55.958
									33	83.509	55.958
									34	83.402	56.066
									35	83.616	56.066
									36	83.616	56.066
									37	83.294	56.066
									38	83.187	56.066
									1	57.674	79.864
									2	57.674	79.864
									3	56.923	74.504
									4	59.818	69.68
									5	57.245	66.464
									6	57.995	61.211
									7	57.674	59.496
									8	58.102	58.317
									9	58.102	58.21
									10	61.211	52.421
									11	59.067	48.776
									12	61.854	45.346
									13	61.962	43.416
									14	59.389	39.664
									15	59.818	34.518
									16	59.818	34.947
									17	60.246	32.053
									18	59.818	29.694
									19	58.746	28.837
									20	58.853	22.834
									21	59.925	19.939
									22	59.925	18.224
									23	60.675	18.76
									24	60.139	14.579
									25	59.067	12.65
									26	59.71	10.72
									27	59.067	11.042
									28	57.352	10.077
									29	58.853	9.541
									30	58.424	11.47
									31	57.138	7.29
									32	56.28	5.574
									33	57.459	5.36
									34	56.923	5.038
									35	56.923	3.002
									36	56.066	4.074
									37	56.923	2.358
									1	59.71	64.963
									2	61.64	65.928
									3	63.141	63.891
									4	63.677	63.891
									5	66.678	64.963
									6	67	66.035
									7	70.002	65.392
									8	69.894	65.178
									9	71.824	65.928
									10	78.578	66.357
									11	81.365	65.178
									12	84.152	63.034
									13	84.795	62.176
									14	85.117	62.819
									15	89.941	60.782
									16	92.835	59.174
									17	93.05	59.282
									18	94.765	59.174
									19	97.23	60.782
									20	98.731	59.818
									21	99.16	60.461
									22	98.302	59.174
									23	100.125	59.389
									24	100.339	60.568
									25	100.125	58.531
									26	101.411	58.21
									27	102.483	59.389
									28	103.877	59.389
									29	103.662	57.781
									30	104.413	58.21
									31	105.699	56.602
									32	106.771	57.674
