# Supplementary material for: ADF and cofilin-1 collaborate to promote cortical actin flow and the leader bleb-based migration of confined cells
Source: eLife. 2021 Jun 25;10:e67856. doi: 10.7554/eLife.67856 (PMC8253594; doi:10.7554/eLife.67856)
Supplement: Figure 2—source data 1. — Spreadsheet of leader bleb and bleb (i.e., all blebs) area measurements. Each measurement is a percent of the total cell area. Data for CFL1, actin depolymerizing factor (ADF), and CFL1 + ADF RNAi are provided. These data are graphed in Figure 2B–C. [file elife-67856-fig2-data1.xlsx]

## Sheet: Sheet1
Leader Bleb Area (%)		(Fig. 2B)			Total Bleb Area (%)		(Fig. 2C)
Non-target	siCFL1	siADF	siCFL1 + siADF		Non-target	siCFL1	siADF	siCFL1 + siADF
21.6606	24.3658	63.3034	19.2304		25.7186	27.6805	61.865	33.4095
50.022	32.7557	63.6643	23.1478		50.7776	35.3578	63.9739	23.6819
29.0551	18.0245	17.9118	27.0574		43.9158	23.7846	18.0553	28.2049
32.0044	16.6739	19.9789	28.2766		35.0148	30.1869	24.9922	41.2634
24.5447	31.8641	16.5174	13.3402		25.7482	47.5215	20.5962	24.0467
33.7171	25.8926	31.631	8.03377		45.1673	27.445	31.6311	30.8837
28.3357	28.9827	21.6827	25.3399		34.5046	39.4057	21.6827	29.2212
14.2027	24.0822	43.7912	4.94487		42.3085	30.1782	40.3868	9.22047
22.2898	46.6508	39.6532	31.1115		40.1759	50.254	28.4634	36.7594
36.316	31.8134	43.9554	28.0437		31.8475	43.8778	43.9554	29.7934
14.5602	27.3495	44.3383	27.7709		13.705	32.591	50.2172	27.7713
44.3293	26.5902	28.5284	20.1906		51.4059	29.1758	36.912	27.097
24.7577	28.2272	29.0081	28.3971		23.5541	28.2272	42.911	44.7511
42.3952	8.65347	39.5734	22.219		43.1051	12.3862	39.5736	25.7048
53.977	19.2263	28.4576	13.1978		53.977	22.5161	45.0477	29.8127
61.1836	30.8007	40.8501	44.7465		61.1836	32.2015	42.2504	44.7465
46.9158	26.7148	32.026	23.35		52.3588	30.5243	33.7024	29.6249
62.3164	48.3317	45.1843	12.2286		62.3164	50.9364	45.1852	26.7024
27.2217	60.0883	23.6642	9.88184		29.5692	60.0883	32.205	21.6048
21.8217	36.5243	30.6576	33.0662		33.8151	39.9943	44.6968	33.9321
23.0623	32.3713	22.0731	45.3709		24.309	45.8949	26.1544	45.371
31.083	35.4435		25.9326		33.3097	35.4435		41.6936
37.7876	16.4621		9.05758		37.7876	31.0551		40.8785
43.5697	37.9866		18.9484		43.5728	38.5273		29.4753
54.8049	23.3128		33.8937		56.3514	32.8913		38.5585
25.9431	27.8166		17.9821		39.2664	31.4016		20.26
70.8856	18.057		9.28003		70.8856	25.5092		44.7628
44.5575	28.1619		14.7324		44.5575	33.6942		40.4411
	11.0945		5.99688			11.2363		17.9681
			5.60354					20.3598
			19.2182					35.3058
