# Supplementary material for: ADF and cofilin-1 collaborate to promote cortical actin flow and the leader bleb-based migration of confined cells
Source: eLife. 2021 Jun 25;10:e67856. doi: 10.7554/eLife.67856 (PMC8253594; doi:10.7554/eLife.67856)
Supplement: Figure 5—source data 1. — Spreadsheet of stiffness (h/d) measurements for CFL1, actin depolymerizing factor (ADF), CFL1 + ADF RNAi, as well as CFL1 + ADF RNAi cells rescued by transfection with RFP-cofilin-1 or RFP-ADF plasmid are provided. These data are graphed in Figure 5A–B. [file elife-67856-fig5-data1.xlsx]

## Sheet: Sheet1
Stiffness (h/d; Figure 5A)						Stiffness (h/d; Figure 5B)
Non-target	siCFL1	siADF	siCFL1 + siADF			Non-target	RFP-cofilin-1 Rescue	RFP-ADF Rescue
0.429465	0.339217	0.5325	0.827915			0.344578	0.856955	0.777047
0.541534	0.394381	0.7889	0.868717			0.336641	0.578947	0.571821
0.422204	0.372775	0.8086	0.655814			0.48968	0.57211	0.656934
0.464912	0.348538	0.8868	0.86781			0.361325	0.635025	0.631096
0.465196	0.500152	0.7606	0.607069			0.468006	0.618593	0.582074
0.452719	0.384579	0.875598	0.646018			0.480788	0.634119	0.51137
0.446854	0.424807	0.763534	0.376826			0.452991	0.517031	0.567293
0.444983	0.484512	0.807368	0.867145			0.570713	0.568331	0.571817
0.445477	0.385456	0.786344	0.638607			0.445358	0.41348	0.631579
0.569526	0.416687	0.78553	0.4222			0.495102	0.518025	0.582781
0.719054	0.748612	0.860124	0.492831			0.615725	0.50412	0.409793
0.65791	0.689463	0.750572	0.354281			0.411243	0.406736	0.347036
0.674824	0.301469	0.815138	0.402715			0.602073	0.546731	0.329263
0.431522	0.491585	0.468094	0.318167			0.561916	0.661224	0.742248
0.645924	0.268127	0.424004	0.566027			0.279851	0.622249	0.771446
0.544335	0.60171	0.444727	0.57764			0.68125	0.651128	0.662376
0.588658	0.56299	0.592976	0.473022			0.598631	0.484795	0.688009
0.641523	0.550699	0.593785	0.498192			0.573959	0.596659	0.574236
0.730618	0.495564	0.476027	0.416321			0.598938	0.558957	0.404478
0.789711	0.590172	0.69958	0.257716			0.567767	0.668151	0.728795
0.835	0.516547	0.657596	0.336399			0.663395	0.721034	0.542141
0.66	0.535178	0.595539	0.498513			0.790816	0.472256	0.517299
0.837	0.369713	0.625369	0.326719			0.325679	0.609057	0.362452
0.641	0.378816	0.506151	0.307087			0.587733	0.65966	0.550325
0.895	0.415066	0.521403	0.351624			0.334969	0.554537	0.45256
0.833	0.596034		0.327945			0.723726	0.872399	0.544269
0.872	0.443134		0.337828			0.44533	0.445962	0.392395
0.840528	0.425282		0.315414			0.558449	0.506073	0.50675
0.78156	0.6643		0.43403			0.575313	0.66997	0.498754
0.881408	0.52459		0.326502			0.6416	0.445591	0.435525
0.879727			0.606747			0.634081	0.466306	0.508081
0.790323			0.706568			0.754839	0.410164	0.408058
0.812076			0.612778			0.750702	0.347099	0.513923
0.676749			0.473957			0.702511	0.452323	0.488304
0.445276			0.585794			0.683048	0.424197	0.563647
0.584197			0.438639			0.647983	0.466937	0.632413
0.512008			0.522119			0.670098	0.410788	0.581169
0.462418			0.327136			0.553919	0.472918	0.680679
0.68203			0.439694			0.574385	0.391868	0.527924
0.694802			0.410722			0.503978	0.539421	0.509405
0.72833			0.463732			0.615249	0.6	0.483477
0.708586			0.37589			0.537122		0.439667
0.590488						0.485015		0.690364
0.585095						0.433729		0.481818
0.372703						0.509893		0.467896
0.40798						0.482018		0.526857
0.381588						0.431961		0.486341
0.441516						0.40104		0.435129
0.549422						0.461362		0.551922
0.553623						0.613636		0.463405
0.565661						0.475181		0.533718
0.367306						0.600218		0.528902
0.361735						0.347524		0.596091
0.396095						0.480277		0.396226
0.437604						0.407455		0.584906
0.458788						0.371866		0.434749
0.831332						0.615779		0.680466
0.73794						0.336776		0.590822
0.698276						0.433294		0.579075
0.49949						0.321232		0.750489
0.543388						0.466755		0.628275
0.626937						0.528412		0.362518
0.575719						0.544004		0.483047
0.434725						0.720124		0.366816
0.8501						0.447422		0.390875
0.9382						0.493002		0.749552
0.847						0.629245		0.590458
0.7725						0.730905		0.515988
0.877021						0.700644		0.578901
0.801681						0.441457		0.496506
0.836576						0.463768		0.521368
0.770726						0.594875		0.47186
0.718569						0.758987		0.626231
0.812791						0.666335		0.422145
0.61686						0.765615
0.723691						0.630978
0.807509						0.603502
0.794289						0.588078
0.875226						0.622485
0.72323						0.684084
0.755082						0.727817
0.765351						0.613432
0.683249						0.591643
0.588283						0.578866
0.726795						0.765048
0.504261						0.867557
0.785269						0.652257
0.489455						0.843267
0.494295						0.654405
0.492017						0.362923
0.441649						0.429465
						0.541534
						0.422204
						0.464912
						0.465196
						0.452719
						0.446854
						0.444983
						0.445477
						0.569526
						0.719054
						0.65791
						0.674824
						0.431522
						0.645924
						0.544335
						0.588658
						0.641523
						0.730618
						0.789711
						0.835
						0.66
						0.837
						0.641
						0.895
						0.833
						0.872
						0.840528
						0.78156
						0.881408
						0.879727
						0.790323
						0.812076
						0.676749
						0.445276
						0.584197
						0.512008
						0.462418
						0.68203
						0.694802
						0.72833
						0.708586
						0.590488
						0.585095
						0.372703
						0.40798
						0.381588
						0.441516
						0.549422
						0.553623
						0.565661
						0.367306
						0.361735
						0.396095
						0.437604
						0.458788
						0.831332
						0.73794
						0.698276
						0.49949
						0.543388
						0.626937
						0.575719
						0.434725
						0.8501
						0.9382
						0.847
						0.7725
						0.877021
						0.801681
						0.836576
						0.770726
						0.718569
						0.812791
						0.61686
						0.723691
						0.807509
						0.794289
						0.875226
						0.72323
						0.755082
						0.765351
						0.683249
						0.588283
						0.726795
						0.504261
						0.785269
						0.489455
						0.494295
						0.492017
						0.441649
